# Supplementary material
Source: PubMed Central journal article supplement (PMC10030442)
Supplement: mmc1.pdf [file mmc1.pdf]

# Online Appendix for: “Promoting COVID-19 Vaccine Confidence through Public Responses to Misinformation: The Joint Influence of Message Source and Message Content”

Professor Reed M. Wood (University of Essex)  
Dr. Marie Juanchich (University of Essex)  
Dr. Mark Ramirez (Arizona State University)  
Dr. Shenghao Zhang (Tsinghua University)

**Ethics Approval:** The Social Sciences Ethics Sub-Committee at the University of Essex reviewed and approved the application for ethical approval of this study (ETH-2122-0259).

Data for this project was collected via an online survey managed by the polling firm YouGov. Surveys were deployed in the United States and United Kingdom and comprised two waves. Wave 1 of the survey was deployed between 17 January 2022 and 21 January 2022, while Wave 2 was deployed between 7 February 2022 and 16 February 2022.

Queries and concerns about the project should be directed to the project lead at: Professor Reed Wood ([reed.wood@essex.ac.uk](mailto:reed.wood@essex.ac.uk)). You can also contact the researchers in writing at: The Department of Government, University of Essex, Colchester CO4 3SQ, United Kingdom

**Replication Materials:** Data, codebooks, and commands to replicate all analyses reported in the manuscript and in this appendix can be found here: <https://osf.io/nwkp3/>

For any additional information, please contact Professor Wood at [reed.wood@essex.ac.uk](mailto:reed.wood@essex.ac.uk)

**Pre-registration:** The study that led to this article was pre-registered with the Open Science Framework (OSF) (<https://osf.io/wc854>). We note, however, that one key aspect of the study deviated from the pre-registration plan. The hypotheses and analyses presented in this manuscript represent a subset of those proposed in our original pre-registration plan. In that plan, we originally presented nine hypotheses. The first subset of these hypotheses focused on the effects of misinformation correction strategies on respondent beliefs about the harms and side effects potentially associated with COVID-19 vaccines. We retain these in our current manuscript. The second subset of hypotheses focused on the effects of misinformation correction on respondent attitudes toward anti-vax protesters. We have reserved this second set of hypotheses for a separate manuscript. After filing the registration plan, we ultimately decided that questions regarding attitudes toward anti-vax protesters exceeded the scope of the argument we developed in the paper, and that journal space constraints would normally not allow for their inclusion.

At the time of this manuscript’s acceptance, we have not fully analyzed the data necessary to evaluate the hypotheses on attitudes toward anti-vax protesters. Regardless, results from these analyses would be unlikely to change the findings presented in the manuscript at hand. In the interest of transparency, we make available all of the data associated with the original pre-registration plan. These data are located with our replication materials for this paper (<https://osf.io/nwkp3/>). Readers interested in these data may wish to specifically examine the variables entitled: “protest\_benefitsociety”, “protest\_credible”, “protest\_raisequestions”, “protest\_influencepeople”, and “protest\_threat”. Information on these variables is available in the code book, which is available with the rest of our replication materials. While we intend to use these data in a subsequent study, we welcome other scholars to use them in their own work.

## Descriptive Statistics and Additional Analyses

**Table A1.1: Summary Statistics by Country (US Sample)**

| Variable                   | N    | Mean   | Std. Dev. | Min | Max |
|----------------------------|------|--------|-----------|-----|-----|
| White                      | 1229 | 0.509  | 0.5       | 0   | 1   |
| Black                      | 1229 | 0.138  | 0.345     | 0   | 1   |
| Latino                     | 1229 | 0.112  | 0.316     | 0   | 1   |
| Asian                      | 1229 | 0.067  | 0.25      | 0   | 1   |
| Other Race/Ethnicity       | 1229 | 0.175  | 0.38      | 0   | 1   |
| Female                     | 1229 | 0.541  | 0.499     | 0   | 1   |
| Parent (Child < 12)        | 1229 | 1.731  | 0.443     | 1   | 2   |
| Income                     | 1058 | 7.956  | 4.012     | 1   | 14  |
| Age                        | 1229 | 47.564 | 17.627    | 18  | 94  |
| University Education       | 1229 | 0.318  | 0.466     | 0   | 1   |
| Ideology US                | 1120 | 2.971  | 1.229     | 1   | 5   |
| Democrat                   | 1229 | 0.379  | 0.485     | 0   | 1   |
| Republican                 | 1229 | 0.258  | 0.438     | 0   | 1   |
| Trust National Govt.       | 1229 | 2.599  | 1.254     | 1   | 5   |
| Trust Health Professionals | 1229 | 3.587  | 1.074     | 1   | 5   |

**Table A1.2: Summary Statistics by Country (UK Sample)**

| Variable                   | N    | Mean   | Std. Dev. | Min | Max |
|----------------------------|------|--------|-----------|-----|-----|
| White                      | 1276 | 0.833  | 0.373     | 0   | 1   |
| Black                      | 1276 | 0.049  | 0.217     | 0   | 1   |
| South Asian                | 1276 | 0.048  | 0.213     | 0   | 1   |
| Arab                       | 1276 | 0.008  | 0.088     | 0   | 1   |
| Chinese                    | 1276 | 0.009  | 0.097     | 0   | 1   |
| White Mixed                | 1276 | 0.012  | 0.108     | 0   | 1   |
| Other Non-white            | 1276 | 0.026  | 0.159     | 0   | 1   |
| Female                     | 1276 | 0.542  | 0.498     | 0   | 1   |
| Parent (Child < 12)        | 1276 | 1.767  | 0.423     | 1   | 2   |
| Income                     | 934  | 7.637  | 3.768     | 1   | 14  |
| Age                        | 1276 | 50.997 | 16.588    | 18  | 88  |
| University Education       | 1276 | 0.339  | 0.473     | 0   | 1   |
| Ideology UK                | 1203 | 3.81   | 1.19      | 1   | 7   |
| Liberal Democrat           | 1276 | 0.068  | 0.252     | 0   | 1   |
| Conservative               | 1276 | 0.265  | 0.441     | 0   | 1   |
| SNP                        | 1276 | 0.029  | 0.17      | 0   | 1   |
| Labour                     | 1276 | 0.244  | 0.43      | 0   | 1   |
| UKIP/Brexit                | 1276 | 0.049  | 0.217     | 0   | 1   |
| Trust National Govt.       | 1276 | 2.686  | 1.115     | 1   | 5   |
| Trust Health Professionals | 1276 | 3.697  | 0.962     | 1   | 5   |

**Table A1.3: Summary Statistics by Experimental Condition (Control) (US)**

| Variable                   | N   | Mean   | Std. Dev. | Min | Max |
|----------------------------|-----|--------|-----------|-----|-----|
| White                      | 247 | 0.466  | 0.5       | 0   | 1   |
| Black                      | 247 | 0.146  | 0.354     | 0   | 1   |
| Latino                     | 247 | 0.113  | 0.318     | 0   | 1   |
| Asian                      | 247 | 0.069  | 0.254     | 0   | 1   |
| Other Race/Ethnicity       | 247 | 0.206  | 0.406     | 0   | 1   |
| Female                     | 247 | 0.51   | 0.501     | 0   | 1   |
| Parent (Child < 12)        | 247 | 1.721  | 0.45      | 1   | 2   |
| Income                     | 217 | 8.014  | 3.914     | 1   | 14  |
| Age                        | 247 | 47.777 | 17.57     | 19  | 84  |
| University Education       | 247 | 0.332  | 0.472     | 0   | 1   |
| Ideology US                | 221 | 2.905  | 1.234     | 1   | 5   |
| Democrat                   | 247 | 0.364  | 0.482     | 0   | 1   |
| Republican                 | 247 | 0.231  | 0.422     | 0   | 1   |
| Trust National Govt.       | 247 | 2.652  | 1.243     | 1   | 5   |
| Trust Health Professionals | 247 | 3.692  | 0.977     | 1   | 5   |

**Table A1.4: Summary Statistics by Experimental Condition (Debunking Health) (US)**

| Variable                   | N   | Mean   | Std. Dev. | Min | Max |
|----------------------------|-----|--------|-----------|-----|-----|
| White                      | 247 | 0.514  | 0.501     | 0   | 1   |
| Black                      | 247 | 0.146  | 0.354     | 0   | 1   |
| Latino                     | 247 | 0.121  | 0.327     | 0   | 1   |
| Asian                      | 247 | 0.049  | 0.215     | 0   | 1   |
| Other Race/Ethnicity       | 247 | 0.17   | 0.376     | 0   | 1   |
| Female                     | 247 | 0.563  | 0.497     | 0   | 1   |
| Parent (Child < 12)        | 247 | 1.729  | 0.446     | 1   | 2   |
| Income                     | 208 | 7.385  | 3.973     | 1   | 14  |
| Age                        | 247 | 46.206 | 17.825    | 18  | 91  |
| University Education       | 247 | 0.283  | 0.452     | 0   | 1   |
| Ideology US                | 225 | 2.893  | 1.175     | 1   | 5   |
| Democrat                   | 247 | 0.385  | 0.487     | 0   | 1   |
| Republican                 | 247 | 0.239  | 0.427     | 0   | 1   |
| Trust National Govt.       | 247 | 2.636  | 1.238     | 1   | 5   |
| Trust Health Professionals | 247 | 3.575  | 1.105     | 1   | 5   |

**Table A1.5: Summary Statistics by Experimental Condition (Debunking Political)  
(US)**

| Variable                   | N   | Mean   | Std. Dev. | Min | Max |
|----------------------------|-----|--------|-----------|-----|-----|
| White                      | 245 | 0.535  | 0.5       | 0   | 1   |
| Black                      | 245 | 0.155  | 0.363     | 0   | 1   |
| Latino                     | 245 | 0.11   | 0.314     | 0   | 1   |
| Asian                      | 245 | 0.065  | 0.248     | 0   | 1   |
| Other Race/Ethnicity       | 245 | 0.135  | 0.342     | 0   | 1   |
| Female                     | 245 | 0.571  | 0.496     | 0   | 1   |
| Parent (Child < 12)        | 245 | 1.755  | 0.431     | 1   | 2   |
| Income                     | 209 | 7.9    | 4.003     | 1   | 14  |
| Age                        | 245 | 49.282 | 16.805    | 18  | 80  |
| University Education       | 245 | 0.318  | 0.467     | 0   | 1   |
| Ideology US                | 227 | 2.907  | 1.285     | 1   | 5   |
| Democrat                   | 245 | 0.404  | 0.492     | 0   | 1   |
| Republican                 | 245 | 0.245  | 0.431     | 0   | 1   |
| Trust National Govt.       | 245 | 2.665  | 1.31      | 1   | 5   |
| Trust Health Professionals | 245 | 3.571  | 1.134     | 1   | 5   |

**Table A1.6: Summary Statistics by Experimental Condition (Discrediting Health) (US)**

| Variable                   | N   | Mean   | Std. Dev. | Min | Max |
|----------------------------|-----|--------|-----------|-----|-----|
| White                      | 244 | 0.529  | 0.5       | 0   | 1   |
| Black                      | 244 | 0.127  | 0.334     | 0   | 1   |
| Latino                     | 244 | 0.094  | 0.293     | 0   | 1   |
| Asian                      | 244 | 0.057  | 0.233     | 0   | 1   |
| Other Race/Ethnicity       | 244 | 0.193  | 0.395     | 0   | 1   |
| Female                     | 244 | 0.533  | 0.5       | 0   | 1   |
| Parent (Child < 12)        | 244 | 1.738  | 0.441     | 1   | 2   |
| Income                     | 212 | 8.547  | 4.106     | 1   | 14  |
| Age                        | 244 | 46.934 | 17.147    | 18  | 88  |
| University Education       | 244 | 0.324  | 0.469     | 0   | 1   |
| Ideology US                | 224 | 2.951  | 1.214     | 1   | 5   |
| Democrat                   | 244 | 0.393  | 0.49      | 0   | 1   |
| Republican                 | 244 | 0.279  | 0.449     | 0   | 1   |
| Trust National Govt.       | 244 | 2.533  | 1.297     | 1   | 5   |
| Trust Health Professionals | 244 | 3.525  | 1.12      | 1   | 5   |

**Table A1.7: Summary Statistics by Experimental condition (Discrediting Political)  
(US)**

| Variable                   | N   | Mean   | Std. Dev. | Min | Max |
|----------------------------|-----|--------|-----------|-----|-----|
| White                      | 246 | 0.5    | 0.501     | 0   | 1   |
| Black                      | 246 | 0.114  | 0.318     | 0   | 1   |
| Latino                     | 246 | 0.122  | 0.328     | 0   | 1   |
| Asian                      | 246 | 0.093  | 0.292     | 0   | 1   |
| Other Race/Ethnicity       | 246 | 0.171  | 0.377     | 0   | 1   |
| Female                     | 246 | 0.528  | 0.5       | 0   | 1   |
| Parent (Child < 12)        | 246 | 1.715  | 0.452     | 1   | 2   |
| Income                     | 212 | 7.92   | 4.016     | 1   | 14  |
| Age                        | 246 | 47.626 | 18.715    | 18  | 94  |
| University Education       | 246 | 0.333  | 0.472     | 0   | 1   |
| Ideology US                | 223 | 3.202  | 1.219     | 1   | 5   |
| Democrat                   | 246 | 0.35   | 0.478     | 0   | 1   |
| Republican                 | 246 | 0.297  | 0.458     | 0   | 1   |
| Trust National Govt.       | 246 | 2.508  | 1.181     | 1   | 5   |
| Trust Health Professionals | 246 | 3.573  | 1.027     | 1   | 5   |



**Table A1.8: Summary Statistics by Experimental Condition (Control) (UK)**

| Variable                   | N   | Mean   | Std. Dev. | Min | Max |
|----------------------------|-----|--------|-----------|-----|-----|
| White                      | 256 | 0.793  | 0.406     | 0   | 1   |
| Black                      | 256 | 0.062  | 0.243     | 0   | 1   |
| South Asian                | 256 | 0.062  | 0.243     | 0   | 1   |
| Arab                       | 256 | 0.012  | 0.108     | 0   | 1   |
| Chinese                    | 256 | 0.008  | 0.088     | 0   | 1   |
| White Mixed                | 256 | 0.004  | 0.062     | 0   | 1   |
| Other Non-white            | 256 | 0.035  | 0.185     | 0   | 1   |
| Female                     | 256 | 0.555  | 0.498     | 0   | 1   |
| Parent (Child < 12)        | 256 | 1.762  | 0.427     | 1   | 2   |
| Income                     | 180 | 7.717  | 3.916     | 1   | 14  |
| Age                        | 256 | 50.543 | 17.232    | 18  | 84  |
| University Education       | 256 | 0.355  | 0.48      | 0   | 1   |
| Ideology UK                | 238 | 3.693  | 1.237     | 1   | 7   |
| Liberal Democrat           | 256 | 0.062  | 0.243     | 0   | 1   |
| Conservative               | 256 | 0.254  | 0.436     | 0   | 1   |
| SNP                        | 256 | 0.027  | 0.163     | 0   | 1   |
| Labour                     | 256 | 0.238  | 0.427     | 0   | 1   |
| UKIP/Brexit                | 256 | 0.035  | 0.185     | 0   | 1   |
| Trust National Govt.       | 256 | 2.758  | 1.146     | 1   | 5   |
| Trust Health Professionals | 256 | 3.742  | 0.988     | 1   | 5   |

**Table A1.9: Summary Statistics by Experimental Condition (Debunking Health) (UK)**

| Variable                   | N   | Mean   | Std. Dev. | Min | Max |
|----------------------------|-----|--------|-----------|-----|-----|
| White                      | 255 | 0.855  | 0.353     | 0   | 1   |
| Black                      | 255 | 0.031  | 0.175     | 0   | 1   |
| South Asian                | 255 | 0.043  | 0.204     | 0   | 1   |
| Arab                       | 255 | 0.004  | 0.063     | 0   | 1   |
| Chinese                    | 255 | 0.008  | 0.088     | 0   | 1   |
| White Mixed                | 255 | 0.02   | 0.139     | 0   | 1   |
| Other Non-white            | 255 | 0.031  | 0.175     | 0   | 1   |
| Female                     | 255 | 0.545  | 0.499     | 0   | 1   |
| Parent (Child < 12)        | 255 | 1.78   | 0.415     | 1   | 2   |
| Income                     | 200 | 7.48   | 3.844     | 1   | 14  |
| Age                        | 255 | 52.337 | 16.479    | 18  | 87  |
| University Education       | 255 | 0.325  | 0.469     | 0   | 1   |
| Ideology UK                | 242 | 3.975  | 1.085     | 1   | 7   |
| Liberal Democrat           | 255 | 0.075  | 0.263     | 0   | 1   |
| Conservative               | 255 | 0.29   | 0.455     | 0   | 1   |
| SNP                        | 255 | 0.027  | 0.164     | 0   | 1   |
| Labour                     | 255 | 0.243  | 0.43      | 0   | 1   |
| UKIP/Brexit                | 255 | 0.059  | 0.236     | 0   | 1   |
| Trust National Govt.       | 255 | 2.773  | 1.117     | 1   | 5   |
| Trust Health Professionals | 255 | 3.698  | 0.947     | 1   | 5   |

**Table A1.10: Summary Statistics by Experimental Condition (Debunking Political)  
(UK)**

| Variable                   | N   | Mean   | Std. Dev. | Min | Max |
|----------------------------|-----|--------|-----------|-----|-----|
| White                      | 251 | 0.861  | 0.347     | 0   | 1   |
| Black                      | 251 | 0.032  | 0.176     | 0   | 1   |
| South Asian                | 251 | 0.052  | 0.222     | 0   | 1   |
| Arab                       | 251 | 0      | 0         | 0   | 0   |
| Chinese                    | 251 | 0.012  | 0.109     | 0   | 1   |
| White Mixed                | 251 | 0.008  | 0.089     | 0   | 1   |
| Other Non-white            | 251 | 0.024  | 0.153     | 0   | 1   |
| Female                     | 251 | 0.506  | 0.501     | 0   | 1   |
| Parent (Child < 12)        | 251 | 1.749  | 0.434     | 1   | 2   |
| Income                     | 186 | 7.645  | 3.575     | 1   | 14  |
| Age                        | 251 | 51.084 | 16.646    | 18  | 85  |
| University Education       | 251 | 0.315  | 0.465     | 0   | 1   |
| Ideology UK                | 240 | 3.829  | 1.251     | 1   | 7   |
| Liberal Democrat           | 251 | 0.064  | 0.245     | 0   | 1   |
| Conservative               | 251 | 0.259  | 0.439     | 0   | 1   |
| SNP                        | 251 | 0.032  | 0.176     | 0   | 1   |
| Labour                     | 251 | 0.227  | 0.42      | 0   | 1   |
| UKIP/Brexit                | 251 | 0.056  | 0.23      | 0   | 1   |
| Trust National Govt.       | 251 | 2.681  | 1.114     | 1   | 5   |
| Trust Health Professionals | 251 | 3.693  | 0.979     | 1   | 5   |

**Table A1.11: Summary Statistics by Experimental condition (Discrediting Health) (UK)**

| Variable                   | N   | Mean   | Std. Dev. | Min | Max |
|----------------------------|-----|--------|-----------|-----|-----|
| White                      | 255 | 0.851  | 0.357     | 0   | 1   |
| Black                      | 255 | 0.055  | 0.228     | 0   | 1   |
| South Asian                | 255 | 0.035  | 0.185     | 0   | 1   |
| Arab                       | 255 | 0.004  | 0.063     | 0   | 1   |
| Chinese                    | 255 | 0.012  | 0.108     | 0   | 1   |
| White Mixed                | 255 | 0.012  | 0.108     | 0   | 1   |
| Other Non-white            | 255 | 0.024  | 0.152     | 0   | 1   |
| Female                     | 255 | 0.569  | 0.496     | 0   | 1   |
| Parent (Child < 12)        | 255 | 1.741  | 0.439     | 1   | 2   |
| Income                     | 186 | 7.457  | 3.92      | 1   | 14  |
| Age                        | 255 | 51.012 | 16.24     | 19  | 88  |
| University Education       | 255 | 0.365  | 0.482     | 0   | 1   |
| Ideology UK                | 241 | 3.9    | 1.147     | 1   | 7   |
| Liberal Democrat           | 255 | 0.075  | 0.263     | 0   | 1   |
| Conservative               | 255 | 0.286  | 0.453     | 0   | 1   |
| SNP                        | 255 | 0.031  | 0.175     | 0   | 1   |
| Labour                     | 255 | 0.22   | 0.415     | 0   | 1   |
| UKIP/Brexit                | 255 | 0.059  | 0.236     | 0   | 1   |
| Trust National Govt.       | 255 | 2.631  | 1.152     | 1   | 5   |
| Trust Health Professionals | 255 | 3.643  | 0.973     | 1   | 5   |

**Table A1.12: Summary Statistics by Experimental condition (Discrediting Political) (UK)**

| Variable                   | N   | Mean   | Std. Dev. | Min | Max |
|----------------------------|-----|--------|-----------|-----|-----|
| White                      | 259 | 0.807  | 0.395     | 0   | 1   |
| Black                      | 259 | 0.066  | 0.248     | 0   | 1   |
| South Asian                | 259 | 0.046  | 0.211     | 0   | 1   |
| Arab                       | 259 | 0.019  | 0.138     | 0   | 1   |
| Chinese                    | 259 | 0.008  | 0.088     | 0   | 1   |
| White Mixed                | 259 | 0.015  | 0.124     | 0   | 1   |
| Other Non-white            | 259 | 0.015  | 0.124     | 0   | 1   |
| Female                     | 259 | 0.537  | 0.5       | 0   | 1   |
| Parent (Child < 12)        | 259 | 1.803  | 0.398     | 1   | 2   |
| Income                     | 182 | 7.907  | 3.587     | 1   | 14  |
| Age                        | 259 | 50.027 | 16.368    | 18  | 82  |
| University Education       | 259 | 0.332  | 0.472     | 0   | 1   |
| Ideology UK                | 242 | 3.649  | 1.2       | 1   | 7   |
| Liberal Democrat           | 259 | 0.066  | 0.248     | 0   | 1   |
| Conservative               | 259 | 0.236  | 0.425     | 0   | 1   |
| SNP                        | 259 | 0.031  | 0.173     | 0   | 1   |
| Labour                     | 259 | 0.29   | 0.454     | 0   | 1   |
| UKIP/Brexit                | 259 | 0.039  | 0.193     | 0   | 1   |
| Trust National Govt.       | 259 | 2.587  | 1.04      | 1   | 5   |
| Trust Health Professionals | 259 | 3.71   | 0.926     | 1   | 5   |

**Table A1.13: Effects of Treatment Conditions on Respondent Vaccine Beliefs**

|                          | Model 1<br>Severe Side<br>Effects US | Model 2<br>Severe Side<br>Effects UK | Model 3<br>Harm<br>Vulnerable<br>US | Model 4<br>Harm<br>Vulnerable<br>UK |
|--------------------------|--------------------------------------|--------------------------------------|-------------------------------------|-------------------------------------|
| Severe Side Effects (w1) | 0.815***<br>(0.020)                  | 0.752***<br>(0.022)                  |                                     |                                     |
| Harm Vulnerable (w1)     |                                      |                                      | 0.723***<br>(0.022)                 | 0.646***<br>(0.024)                 |
| Debunking (Health)       | -0.163+<br>(0.089)                   | -0.186*<br>(0.073)                   | -0.084<br>(0.100)                   | -0.237**<br>(0.082)                 |
| Debunking (Political)    | 0.057<br>(0.088)                     | -0.080<br>(0.074)                    | 0.008<br>(0.099)                    | -0.031<br>(0.083)                   |
| Discrediting (Health)    | -0.022<br>(0.088)                    | -0.025<br>(0.073)                    | 0.119<br>(0.098)                    | -0.009<br>(0.082)                   |
| Discrediting (Political) | 0.061<br>(0.088)                     | 0.023<br>(0.073)                     | 0.115<br>(0.098)                    | -0.053<br>(0.082)                   |
| Intercept                | 0.557***<br>(0.084)                  | 0.602***<br>(0.074)                  | 0.740***<br>(0.097)                 | 0.856***<br>(0.085)                 |
| Num. Obs.                | 1054                                 | 1203                                 | 1054                                | 1203                                |
| R2                       | 0.619                                | 0.506                                | 0.503                               | 0.385                               |
| R2 Adj.                  | 0.617                                | 0.504                                | 0.501                               | 0.382                               |
| AIC                      | 2793.1                               | 2889.8                               | 3037.2                              | 3166.9                              |
| BIC                      | 2827.8                               | 2925.5                               | 3071.9                              | 3202.5                              |
| Log.Lik.                 | -1389.535                            | -1437.905                            | -1511.604                           | -1576.428                           |
| RMSE                     | 0.90                                 | 0.80                                 | 1.02                                | 0.90                                |

Coefficients and standard errors (in parentheses) from OLS models. +  $p < 0.1$ , \*  $p < 0.05$ , \*\*  $p < 0.01$ , \*\*\*  $p < 0.001$

**Table A1.14: Conditional Effect of Vaccination Status - Debunking (Health)**

|                                      | Model 1<br>Severe Side<br>Effects US | Model 2<br>Severe Side<br>Effects UK | Model 3<br>Harm<br>Vulnerable<br>US | Model 4<br>Harm<br>Vulnerable<br>UK |
|--------------------------------------|--------------------------------------|--------------------------------------|-------------------------------------|-------------------------------------|
| Debunking (Health) ×<br>Unvaccinated | 0.123<br>(0.182)                     | -0.262<br>(0.233)                    | -0.084<br>(0.200)                   | 0.123<br>(0.259)                    |
| Unvaccinated                         | 0.585***<br>(0.088)                  | 0.762***<br>(0.120)                  | 0.751***<br>(0.094)                 | 0.855***<br>(0.134)                 |
| Severe Side Effects (w1)             | 0.728***<br>(0.023)                  | 0.685***<br>(0.023)                  |                                     |                                     |
| Harm Vulnerable (w1)                 |                                      |                                      | 0.634***<br>(0.024)                 | 0.565***<br>(0.025)                 |
| Debunking (Health)                   | -0.217*<br>(0.095)                   | -0.182*<br>(0.073)                   | -0.107<br>(0.105)                   | -0.256***<br>(0.081)                |
| Debunking (Political)                | 0.024<br>(0.087)                     | -0.093<br>(0.073)                    | -0.062<br>(0.096)                   | -0.041<br>(0.081)                   |
| Discrediting (Health)                | -0.018<br>(0.087)                    | -0.056<br>(0.072)                    | 0.058<br>(0.096)                    | -0.045<br>(0.081)                   |
| Discrediting (Political)             | 0.062<br>(0.087)                     | 0.016<br>(0.072)                     | 0.054<br>(0.096)                    | -0.059<br>(0.080)                   |
| Intercept                            | 0.683***<br>(0.085)                  | 0.731***<br>(0.075)                  | 0.882***<br>(0.095)                 | 1.018***<br>(0.085)                 |
| Num.Obs.                             | 1003                                 | 1194                                 | 1003                                | 1194                                |
| R2                                   | 0.635                                | 0.514                                | 0.544                               | 0.402                               |
| R2 Adj.                              | 0.633                                | 0.511                                | 0.541                               | 0.399                               |
| AIC                                  | 2611.4                               | 2826.5                               | 2799.8                              | 3085.3                              |
| BIC                                  | 2655.6                               | 2872.3                               | 2844.0                              | 3131.1                              |
| Log.Lik.                             | -1296.684                            | -1404.270                            | -1390.887                           | -1533.671                           |
| RMSE                                 | 0.88                                 | 0.78                                 | 0.97                                | 0.87                                |

Coefficients and standard errors (in parentheses) from OLS models. + p < 0.1, \* p < 0.05, \*\* p < 0.01, \*\*\* p < 0.001

**Table A1.15: Conditional Effect of Vaccination Status- Debunking (Political)**

|                                         | Model 1<br>Severe Side<br>Effects US | Model 2<br>Severe Side<br>Effects UK | Model 3<br>Harm<br>Vulnerable<br>US | Model 4<br>Harm<br>Vulnerable<br>UK |
|-----------------------------------------|--------------------------------------|--------------------------------------|-------------------------------------|-------------------------------------|
| Debunking (Political) ×<br>Unvaccinated | -0.239<br>(0.170)                    | -0.045<br>(0.238)                    | 0.055<br>(0.187)                    | -0.233<br>(0.265)                   |
| Unvaccinated                            | 0.658***<br>(0.088)                  | 0.709***<br>(0.120)                  | 0.724***<br>(0.095)                 | 0.938***<br>(0.133)                 |
| Severe Side Effects (w1)                | 0.730***<br>(0.023)                  | 0.685***<br>(0.023)                  |                                     |                                     |
| Harm Vulnerable (w1)                    |                                      |                                      | 0.633***<br>(0.024)                 | 0.564***<br>(0.025)                 |
| Debunking (Health)                      | -0.194*<br>(0.089)                   | -0.198**<br>(0.072)                  | -0.123<br>(0.098)                   | -0.250**<br>(0.080)                 |
| Debunking (Political)                   | 0.074<br>(0.094)                     | -0.089<br>(0.074)                    | -0.073<br>(0.103)                   | -0.028<br>(0.082)                   |
| Discrediting (Health)                   | -0.020<br>(0.087)                    | -0.054<br>(0.072)                    | 0.058<br>(0.096)                    | -0.048<br>(0.081)                   |
| Discrediting (Political)                | 0.062<br>(0.087)                     | 0.016<br>(0.072)                     | 0.054<br>(0.096)                    | -0.059<br>(0.080)                   |
| Intercept                               | 0.664***<br>(0.085)                  | 0.732***<br>(0.075)                  | 0.888***<br>(0.095)                 | 1.018***<br>(0.085)                 |
| Num.Obs.                                | 1003                                 | 1194                                 | 1003                                | 1194                                |
| R2                                      | 0.636                                | 0.513                                | 0.544                               | 0.403                               |
| R2 Adj.                                 | 0.633                                | 0.510                                | 0.541                               | 0.399                               |
| AIC                                     | 2609.8                               | 2827.8                               | 2799.9                              | 3084.8                              |
| BIC                                     | 2654.0                               | 2873.5                               | 2844.1                              | 3130.6                              |
| Log.Lik.                                | -1295.917                            | -1404.889                            | -1390.933                           | -1533.395                           |
| RMSE                                    | 0.88                                 | 0.78                                 | 0.97                                | 0.87                                |

Coefficients and standard errors (in parentheses) from OLS models. + p < 0.1, \* p < 0.05, \*\* p < 0.01, \*\*\* p < 0.001



**Table A1.16: Conditional Effect of Vaccination Status - Discrediting (Health)**

|                                         | Model 1<br>Severe Side<br>Effects US | Model 2<br>Severe Side<br>Effects UK | Model 3<br>Harm<br>Vulnerable US | Model 4<br>Harm Vulnerable<br>UK |
|-----------------------------------------|--------------------------------------|--------------------------------------|----------------------------------|----------------------------------|
| Discrediting (Health)<br>× Unvaccinated | 0.083<br>(0.175)                     | 0.224<br>(0.221)                     | -0.070<br>(0.192)                | 0.297<br>(0.246)                 |
| Unvaccinated                            | 0.591***<br>(0.089)                  | 0.638***<br>(0.123)                  | 0.750***<br>(0.095)              | 0.804***<br>(0.136)              |
| Severe Side Effects<br>(w1)             | 0.728***<br>(0.023)                  | 0.685***<br>(0.023)                  |                                  |                                  |
| Harm Vulnerable<br>(w1)                 |                                      |                                      | 0.633***<br>(0.024)              | 0.564***<br>(0.025)              |
| Debunking (Health)                      | -0.193*<br>(0.089)                   | -0.196**<br>(0.072)                  | -0.123<br>(0.098)                | -0.246**<br>(0.080)              |
| Debunking (Political)                   | 0.024<br>(0.087)                     | -0.090<br>(0.073)                    | -0.062<br>(0.096)                | -0.039<br>(0.081)                |
| Discrediting (Health)                   | -0.035<br>(0.094)                    | -0.069<br>(0.074)                    | 0.072<br>(0.103)                 | -0.067<br>(0.082)                |
| Discrediting<br>(Political)             | 0.062<br>(0.087)                     | 0.016<br>(0.072)                     | 0.054<br>(0.096)                 | -0.059<br>(0.080)                |
| Intercept                               | 0.682***<br>(0.085)                  | 0.734***<br>(0.075)                  | 0.882***<br>(0.095)              | 1.023***<br>(0.085)              |
| Num.Obs.                                | 1003                                 | 1194                                 | 1003                             | 1194                             |
| R2                                      | 0.635                                | 0.513                                | 0.544                            | 0.403                            |
| R2 Adj.                                 | 0.633                                | 0.511                                | 0.541                            | 0.400                            |
| AIC                                     | 2611.6                               | 2826.8                               | 2799.8                           | 3084.1                           |
| BIC                                     | 2655.8                               | 2872.5                               | 2844.0                           | 3129.9                           |
| Log.Lik.                                | -1296.801                            | -1404.391                            | -1390.910                        | -1533.051                        |
| RMSE                                    | 0.88                                 | 0.78                                 | 0.97                             | 0.87                             |

Coefficients and standard errors (in parentheses) from OLS models. + p < 0.1, \* p < 0.05, \*\* p < 0.01, \*\*\* p < 0.001

**Table A1.17: Conditional Effect of Vaccination Status - Discrediting (Political)**

|                                            | Model 1<br>Severe Side<br>Effects US | Model 2<br>Severe Side<br>Effects UK | Model 3<br>Harm<br>Vulnerable<br>US | Model 4<br>Harm<br>Vulnerable<br>UK |
|--------------------------------------------|--------------------------------------|--------------------------------------|-------------------------------------|-------------------------------------|
| Discrediting (Political)<br>× Unvaccinated | 0.024<br>(0.181)                     | -0.224<br>(0.288)                    | 0.185<br>(0.199)                    | -0.362<br>(0.321)                   |
| Unvaccinated                               | 0.603***<br>(0.089)                  | 0.728***<br>(0.113)                  | 0.699***<br>(0.095)                 | 0.931***<br>(0.125)                 |
| Severe Side Effects<br>(w1)                | 0.728***<br>(0.023)                  | 0.686***<br>(0.023)                  |                                     |                                     |
| Harm Vulnerable (w1)                       |                                      |                                      | 0.635***<br>(0.024)                 | 0.567***<br>(0.025)                 |
| Debunking (Health)                         | -0.193*<br>(0.089)                   | -0.199**<br>(0.072)                  | -0.123<br>(0.098)                   | -0.250**<br>(0.080)                 |
| Debunking (Political)                      | 0.024<br>(0.087)                     | -0.092<br>(0.073)                    | -0.060<br>(0.095)                   | -0.043<br>(0.081)                   |
| Discrediting (Health)                      | -0.018<br>(0.087)                    | -0.055<br>(0.072)                    | 0.058<br>(0.096)                    | -0.048<br>(0.081)                   |
| Discrediting (Political)                   | 0.058<br>(0.093)                     | 0.024<br>(0.073)                     | 0.021<br>(0.103)                    | -0.045<br>(0.081)                   |
| Intercept                                  | 0.680***<br>(0.085)                  | 0.728***<br>(0.076)                  | 0.888***<br>(0.095)                 | 1.012***<br>(0.085)                 |
| Num.Obs.                                   | 1003                                 | 1194                                 | 1003                                | 1194                                |
| R2                                         | 0.635                                | 0.513                                | 0.544                               | 0.403                               |
| R2 Adj.                                    | 0.633                                | 0.510                                | 0.541                               | 0.399                               |
| AIC                                        | 2611.8                               | 2827.2                               | 2799.1                              | 3084.3                              |
| BIC                                        | 2656.0                               | 2873.0                               | 2843.3                              | 3130.1                              |
| Log.Lik.                                   | -1296.906                            | -1404.604                            | -1390.543                           | -1533.144                           |
| RMSE                                       | 0.88                                 | 0.78                                 | 0.97                                | 0.87                                |

Coefficients and standard errors (in parentheses) from OLS models. + p < 0.1, \* p < 0.05, \*\* p < 0.01, \*\*\* p < 0.001

**Table A1.18: Conditional Effect of Political Ideology- Debunking (Health)**

|                                     | Model 1<br>Severe Side<br>Effects US | Model 2<br>Severe Side<br>Effects UK | Model 3<br>Harm<br>Vulnerable<br>US | Model 4<br>Harm<br>Vulnerable<br>UK |
|-------------------------------------|--------------------------------------|--------------------------------------|-------------------------------------|-------------------------------------|
| Debunking (Health) ×<br>Ideology US | 0.158**<br>(0.060)                   |                                      | 0.169*<br>(0.067)                   |                                     |
| Debunking (Health) ×<br>Ideology UK |                                      | 0.002<br>(0.053)                     |                                     | 0.064<br>(0.059)                    |
| Severe Side Effects (w1)            | 0.770***<br>(0.022)                  | 0.737***<br>(0.022)                  |                                     |                                     |
| Harm Vulnerable (w1)                |                                      |                                      | 0.674***<br>(0.024)                 | 0.633***<br>(0.024)                 |
| Debunking (Health)                  | -0.580**<br>(0.196)                  | -0.228<br>(0.221)                    | -0.519*<br>(0.218)                  | -0.530*<br>(0.246)                  |
| Debunking (Political)               | 0.052<br>(0.087)                     | -0.071<br>(0.075)                    | 0.028<br>(0.097)                    | -0.037<br>(0.083)                   |
| Discrediting (Health)               | -0.010<br>(0.088)                    | -0.025<br>(0.075)                    | 0.114<br>(0.098)                    | -0.045<br>(0.083)                   |
| Discrediting (Political)            | 0.012<br>(0.088)                     | -0.011<br>(0.074)                    | 0.041<br>(0.098)                    | -0.105<br>(0.082)                   |
| Ideology UK                         |                                      | 0.048*<br>(0.022)                    |                                     | 0.025<br>(0.025)                    |
| Ideology US                         | 0.136***<br>(0.027)                  |                                      | 0.167***<br>(0.030)                 |                                     |
| Intercept                           | 0.275**<br>(0.102)                   | 0.458***<br>(0.108)                  | 0.382***<br>(0.115)                 | 0.793***<br>(0.122)                 |
| Num.Obs.                            | 972                                  | 1145                                 | 972                                 | 1145                                |
| R2                                  | 0.650                                | 0.504                                | 0.550                               | 0.389                               |
| R2 Adj.                             | 0.648                                | 0.501                                | 0.547                               | 0.385                               |
| AIC                                 | 2498.9                               | 2726.4                               | 2706.9                              | 2971.9                              |
| BIC                                 | 2542.8                               | 2771.8                               | 2750.8                              | 3017.3                              |
| Log.Lik.                            | -1240.453                            | -1354.208                            | -1344.450                           | -1476.934                           |
| RMSE                                | 0.87                                 | 0.79                                 | 0.96                                | 0.88                                |

Coefficients and standard errors (in parentheses) from OLS models. +  $p < 0.1$ , \*  $p < 0.05$ , \*\*  $p < 0.01$ , \*\*\*  $p < 0.001$

**Table A1.19: Conditional Effect of Ideology - Debunking (Political)**

|                                        | Model 1<br>Severe Side<br>Effects US | Model 2<br>Severe Side<br>Effects UK | Model 3<br>Harm<br>Vulnerable<br>US | Model 4<br>Harm<br>Vulnerable<br>UK |
|----------------------------------------|--------------------------------------|--------------------------------------|-------------------------------------|-------------------------------------|
| Debunking (Political) ×<br>Ideology US | -0.042<br>(0.055)                    |                                      | 0.024<br>(0.061)                    |                                     |
| Debunking (Political) ×<br>Ideology UK |                                      | 0.018<br>(0.049)                     |                                     | 0.006<br>(0.054)                    |
| Ideology UK                            |                                      | 0.044+<br>(0.023)                    |                                     | 0.035<br>(0.025)                    |
| Ideology US                            | 0.171***<br>(0.028)                  |                                      | 0.190***<br>(0.031)                 |                                     |
| Severe Side Effects (w1)               | 0.773***<br>(0.022)                  | 0.736***<br>(0.022)                  |                                     |                                     |
| Harm Vulnerable (w1)                   |                                      |                                      | 0.676***<br>(0.024)                 | 0.634***<br>(0.024)                 |
| Debunking (Health)                     | -0.118<br>(0.090)                    | -0.218**<br>(0.074)                  | -0.028<br>(0.100)                   | -0.279***<br>(0.082)                |
| Debunking (Political)                  | 0.175<br>(0.181)                     | -0.140<br>(0.200)                    | -0.040<br>(0.202)                   | -0.060<br>(0.222)                   |
| Discrediting (Health)                  | -0.011<br>(0.088)                    | -0.024<br>(0.075)                    | 0.114<br>(0.098)                    | -0.047<br>(0.083)                   |
| Discrediting (Political)               | 0.002<br>(0.089)                     | -0.011<br>(0.074)                    | 0.035<br>(0.099)                    | -0.104<br>(0.082)                   |
| Intercept                              | 0.163<br>(0.104)                     | 0.471***<br>(0.110)                  | 0.308**<br>(0.116)                  | 0.756***<br>(0.124)                 |
| Num.Obs.                               | 972                                  | 1145                                 | 972                                 | 1145                                |
| R2                                     | 0.648                                | 0.505                                | 0.547                               | 0.388                               |
| R2 Adj.                                | 0.646                                | 0.501                                | 0.544                               | 0.384                               |
| AIC                                    | 2505.4                               | 2726.3                               | 2713.2                              | 2973.0                              |
| BIC                                    | 2549.3                               | 2771.7                               | 2757.1                              | 3018.4                              |
| Log.Lik.                               | -1243.684                            | -1354.139                            | -1347.597                           | -1477.516                           |
| RMSE                                   | 0.87                                 | 0.79                                 | 0.97                                | 0.88                                |

Coefficients and standard errors (in parentheses) from OLS models. + p < 0.1, \* p < 0.05, \*\* p < 0.01, \*\*\* p < 0.001

**Table A1.20: Conditional Effect of Ideology - Discrediting (Health)**

|                                        | Model 1<br>Severe Side<br>Effects US | Model 2<br>Severe Side<br>Effects UK | Model 3<br>Harm<br>Vulnerable<br>US | Model 4<br>Harm<br>Vulnerable<br>UK |
|----------------------------------------|--------------------------------------|--------------------------------------|-------------------------------------|-------------------------------------|
| Discrediting (Health)<br>× Ideology US | 0.019<br>(0.057)                     |                                      | -0.004<br>(0.063)                   |                                     |
| Discrediting (Health)<br>× Ideology UK |                                      | -0.013<br>(0.051)                    |                                     | 0.030<br>(0.057)                    |
| Ideology UK                            |                                      | 0.050*<br>(0.022)                    |                                     | 0.031<br>(0.025)                    |
| Ideology US                            | 0.159***<br>(0.027)                  |                                      | 0.196***<br>(0.030)                 |                                     |
| Severe Side Effects<br>(w1)            | 0.772***<br>(0.022)                  | 0.737***<br>(0.022)                  |                                     |                                     |
| Harm Vulnerable<br>(w1)                |                                      |                                      | 0.676***<br>(0.024)                 | 0.634***<br>(0.024)                 |
| Debunking (Health)                     | -0.119<br>(0.090)                    | -0.220**<br>(0.074)                  | -0.028<br>(0.100)                   | -0.278***<br>(0.082)                |
| Debunking (Political)                  | 0.054<br>(0.088)                     | -0.071<br>(0.075)                    | 0.030<br>(0.098)                    | -0.038<br>(0.083)                   |
| Discrediting (Health)                  | -0.065<br>(0.189)                    | 0.027<br>(0.211)                     | 0.126<br>(0.210)                    | -0.162<br>(0.235)                   |
| Discrediting<br>(Political)            | 0.006<br>(0.089)                     | -0.011<br>(0.074)                    | 0.033<br>(0.099)                    | -0.104<br>(0.082)                   |
| Intercept                              | 0.202*<br>(0.103)                    | 0.447***<br>(0.109)                  | 0.290*<br>(0.116)                   | 0.772***<br>(0.123)                 |
| Num.Obs.                               | 972                                  | 1145                                 | 972                                 | 1145                                |
| R2                                     | 0.648                                | 0.505                                | 0.547                               | 0.388                               |
| R2 Adj.                                | 0.645                                | 0.501                                | 0.544                               | 0.385                               |
| AIC                                    | 2505.8                               | 2726.3                               | 2713.3                              | 2972.8                              |
| BIC                                    | 2549.8                               | 2771.7                               | 2757.3                              | 3018.2                              |
| Log.Lik.                               | -1243.924                            | -1354.175                            | -1347.673                           | -1477.385                           |
| RMSE                                   | 0.87                                 | 0.79                                 | 0.97                                | 0.88                                |

Coefficients and standard errors (in parentheses) from OLS models. +  $p < 0.1$ , \*  $p < 0.05$ , \*\*  $p < 0.01$ , \*\*\*  $p < 0.001$

**Table A1.21: Conditional Effect of Ideology - Discrediting (Political)**

|                                           | Model 1<br>Severe Side<br>Effects US | Model 2<br>Severe Side<br>Effects UK | Model 3<br>Harm<br>Vulnerable<br>US | Model 4<br>Harm<br>Vulnerable<br>UK |
|-------------------------------------------|--------------------------------------|--------------------------------------|-------------------------------------|-------------------------------------|
| Discrediting (Political)<br>× Ideology US | -0.062<br>(0.058)                    |                                      | -0.105<br>(0.064)                   |                                     |
| Discrediting (Political)<br>× Ideology UK |                                      | 0.018<br>(0.049)                     |                                     | 0.001<br>(0.055)                    |
| Ideology UK                               |                                      | 0.044+<br>(0.023)                    |                                     | 0.036<br>(0.025)                    |
| Ideology US                               | 0.175***<br>(0.027)                  |                                      | 0.216***<br>(0.030)                 |                                     |
| Severe Side Effects<br>(w1)               | 0.772***<br>(0.022)                  | 0.737***<br>(0.022)                  |                                     |                                     |
| Harm Vulnerable (w1)                      |                                      |                                      | 0.675***<br>(0.024)                 | 0.634***<br>(0.024)                 |
| Debunking (Health)                        | -0.118<br>(0.090)                    | -0.218**<br>(0.074)                  | -0.028<br>(0.100)                   | -0.279***<br>(0.082)                |
| Debunking (Political)                     | 0.054<br>(0.088)                     | -0.070<br>(0.075)                    | 0.031<br>(0.097)                    | -0.038<br>(0.083)                   |
| Discrediting (Health)                     | -0.010<br>(0.088)                    | -0.024<br>(0.075)                    | 0.114<br>(0.098)                    | -0.048<br>(0.083)                   |
| Discrediting (Political)                  | 0.202<br>(0.202)                     | -0.078<br>(0.194)                    | 0.365<br>(0.225)                    | -0.109<br>(0.216)                   |
| Intercept                                 | 0.156<br>(0.102)                     | 0.470***<br>(0.109)                  | 0.233*<br>(0.115)                   | 0.752***<br>(0.123)                 |
| Num.Obs.                                  | 972                                  | 1145                                 | 972                                 | 1145                                |
| R2                                        | 0.648                                | 0.505                                | 0.548                               | 0.388                               |
| R2 Adj.                                   | 0.646                                | 0.501                                | 0.545                               | 0.384                               |
| AIC                                       | 2504.8                               | 2726.3                               | 2710.6                              | 2973.0                              |
| BIC                                       | 2548.7                               | 2771.7                               | 2754.6                              | 3018.4                              |
| Log.Lik.                                  | -1243.387                            | -1354.138                            | -1346.320                           | -1477.521                           |
| RMSE                                      | 0.87                                 | 0.79                                 | 0.97                                | 0.88                                |

Coefficients and standard errors (in parentheses) from OLS models. + p < 0.1, \* p < 0.05, \*\* p < 0.01, \*\*\* p < 0.001

**Table A1.22: Results with complete sample of respondents**

|                          | Model 1<br>Severe Side<br>Effects US | Model 2<br>Severe Side<br>Effects UK | Model 3<br>Harm<br>Vulnerable<br>US | Model 4<br>Harm<br>Vulnerable<br>UK |
|--------------------------|--------------------------------------|--------------------------------------|-------------------------------------|-------------------------------------|
| Severe Side Effects (w1) | 0.790***<br>(0.019)                  | 0.744***<br>(0.021)                  |                                     |                                     |
| Harm Vulnerable (w1)     |                                      |                                      | 0.694***<br>(0.022)                 | 0.646***<br>(0.023)                 |
| Debunking (Health)       | -0.157+<br>(0.086)                   | -0.177*<br>(0.074)                   | -0.062<br>(0.096)                   | -0.239**<br>(0.082)                 |
| Debunking (Political)    | 0.039<br>(0.086)                     | -0.074<br>(0.074)                    | -0.002<br>(0.097)                   | -0.017<br>(0.082)                   |
| Discrediting (Health)    | -0.081<br>(0.086)                    | -0.027<br>(0.074)                    | 0.085<br>(0.097)                    | -0.006<br>(0.082)                   |
| Discrediting (Political) | 0.034<br>(0.086)                     | 0.001<br>(0.074)                     | 0.091<br>(0.097)                    | -0.044<br>(0.081)                   |
| Intercept                | 0.653***<br>(0.082)                  | 0.651***<br>(0.075)                  | 0.840***<br>(0.095)                 | 0.876***<br>(0.084)                 |
| Num. Obs.                | 1229                                 | 1276                                 | 1229                                | 1276                                |
| R2                       | 0.584                                | 0.495                                | 0.461                               | 0.386                               |
| R2 Adj.                  | 0.583                                | 0.493                                | 0.459                               | 0.383                               |
| AIC                      | 3382.8                               | 3167.8                               | 3665.6                              | 3422.7                              |
| BIC                      | 3418.6                               | 3203.9                               | 3701.4                              | 3458.7                              |
| Log.Lik.                 | -1684.411                            | -1576.915                            | -1825.783                           | -1704.334                           |
| RMSE                     | 0.95                                 | 0.83                                 | 1.07                                | 0.92                                |

Coefficients and standard errors (in parentheses) from OLS models. +  $p < 0.1$ , \*  $p < 0.05$ , \*\*  $p < 0.01$ , \*\*\*  $p < 0.001$ . Results include speeders and respondents who failed attention check.

**Table A1.23: Results including Control Variables**

|                               | Model 1<br>Severe Side<br>Effects US | Model 2<br>Severe Side<br>Effects UK | Model 3<br>Harm<br>Vulnerable<br>US | Model 4<br>Harm<br>Vulnerable<br>UK |
|-------------------------------|--------------------------------------|--------------------------------------|-------------------------------------|-------------------------------------|
| Severe Side Effects (w1)      | 0.663***<br>(0.027)                  | 0.627***<br>(0.029)                  |                                     |                                     |
| Harm Vulnerable (w1)          |                                      |                                      | 0.572***<br>(0.028)                 | 0.544***<br>(0.031)                 |
| Debunking (Health)            | -0.180+<br>(0.097)                   | -0.183*<br>(0.086)                   | -0.108<br>(0.105)                   | -0.263**<br>(0.094)                 |
| Debunking (Political)         | 0.050<br>(0.093)                     | -0.061<br>(0.088)                    | 0.009<br>(0.100)                    | -0.081<br>(0.096)                   |
| Discrediting (Health)         | 0.005<br>(0.093)                     | 0.028<br>(0.088)                     | 0.077<br>(0.101)                    | -0.073<br>(0.096)                   |
| Discrediting (Political)      | 0.013<br>(0.094)                     | -0.075<br>(0.089)                    | 0.021<br>(0.101)                    | -0.161+<br>(0.097)                  |
| Trust Health<br>Professionals | -0.142***<br>(0.036)                 | -0.085*<br>(0.034)                   | -0.125**<br>(0.038)                 | -0.149***<br>(0.037)                |
| Trust National Govt.          | -0.136***<br>(0.032)                 | -0.050+<br>(0.028)                   | -0.151***<br>(0.035)                | -0.042<br>(0.031)                   |
| Black (US/UK)                 | 0.196+<br>(0.100)                    | 0.113<br>(0.133)                     | 0.364***<br>(0.108)                 | 0.290**<br>(0.146)                  |
| South Asian (UK)              |                                      | 0.406**<br>(0.158)                   |                                     | 0.266<br>(0.171)                    |
| Arab (UK)                     |                                      | 0.181<br>(0.331)                     |                                     | 0.779*<br>(0.360)                   |
| Chinese (UK)                  |                                      | -0.178<br>(0.331)                    |                                     | -0.086<br>(0.359)                   |
| Latino (US)                   | -0.087<br>(0.110)                    |                                      | 0.079<br>(0.118)                    |                                     |
| Asian (US)                    | 0.011<br>(0.133)                     |                                      | 0.059<br>(0.143)                    |                                     |
| White Mixed (UK)              |                                      | -0.092<br>(0.235)                    |                                     |                                     |
| Other Non-white (UK)          |                                      | 0.051<br>(0.184)                     |                                     | 0.167<br>(0.229)                    |
| Other Race (US)               | -0.003<br>(0.090)                    |                                      | 0.253**<br>(0.097)                  |                                     |
| Female                        | -0.065<br>(0.061)                    | 0.049<br>(0.056)                     | -0.050<br>(0.066)                   | 0.011<br>(0.061)                    |
| Parent (Child < 12)           | 0.088<br>(0.073)                     | 0.096<br>(0.071)                     | 0.194*<br>(0.079)                   | 0.205**<br>(0.078)                  |
| Age                           | -0.002<br>(0.002)                    | -0.003<br>(0.002)                    | -0.003<br>(0.002)                   | -0.002<br>(0.002)                   |
| University Education          | -0.003<br>(0.070)                    | -0.083<br>(0.064)                    | -0.084<br>(0.075)                   | -0.088<br>(0.070)                   |
| Income                        | -0.014<br>(0.009)                    | -0.009<br>(0.008)                    | -0.010<br>(0.009)                   | -0.011<br>(0.009)                   |
| Ideology UK                   |                                      | 0.061*                               |                                     | 0.049                               |



|                  |           |          |           |           |
|------------------|-----------|----------|-----------|-----------|
|                  |           | (0.029)  |           | (0.032)   |
| Liberal Democrat |           | 0.090    |           | 0.104     |
|                  |           | (0.111)  |           | (0.121)   |
| UKIP             |           | 0.276*   |           | 0.063     |
|                  |           | (0.128)  |           | (0.139)   |
| SNP              |           | -0.106   |           | -0.058    |
|                  |           | (0.159)  |           | (0.173)   |
| Labour           |           | 0.099    |           | 0.050     |
|                  |           | (0.075)  |           | (0.082)   |
| Ideology US      | 0.104**   |          | 0.131***  |           |
|                  | (0.032)   |          | (0.034)   |           |
| Democrat         | 0.022     |          | 0.047     |           |
|                  | (0.081)   |          | (0.087)   |           |
| Republican       | 0.199*    |          | 0.209*    |           |
|                  | (0.083)   |          | (0.090)   |           |
| Intercept        | 1.695***  | 1.239*** | 1.771***  | 1.779***  |
|                  | (0.250)   | (0.250)  | (0.269)   | (0.271)   |
| Num.Obs.         | 836       | 851      | 836       | 851       |
| R2               | 0.662     | 0.496    | 0.593     | 0.422     |
| R2 Adj.          | 0.654     | 0.483    | 0.583     | 0.406     |
| AIC              | 2143.7    | 2047.7   | 2270.3    | 2190.3    |
| BIC              | 2243.0    | 2161.6   | 2369.6    | 2304.2    |
| Log.Lik.         | -1050.849 | -999.859 | -1114.127 | -1071.128 |
| RMSE             | 0.85      | 0.80     | 0.92      | 0.85      |

Coefficients and standard errors (in parentheses) from OLS models. +  $p < 0.1$ , \*  $p < 0.05$ , \*\*  $p < 0.01$ , \*\*\*  $p < 0.001$

**Table A1.24: Comparison of Wave 2 Samples to Corresponding Populations**

|                                            | US<br>Population | US<br>Sample | UK<br>Population | UK<br>Sample |
|--------------------------------------------|------------------|--------------|------------------|--------------|
| Female                                     | 51%              | 54%          | 51%              | 54%          |
| 65 or over                                 | 17%              | 20%          | 23%              | 27%          |
| High school degree<br>or some college (US) | 55%              | 56%          | NA               | NA           |
| Level 3 Qualification<br>or higher (UK)*   | NA               | NA           | 66%              | 62%          |
| University degree                          | 33%              | 32%          | 30%              | 34%          |
| White                                      | 59%              | 51%          | 81%              | 83%          |
| Black                                      | 13%              | 14%          | 3%               | 5%           |
| Hispanic                                   | 18%              | 11%          | NA               | NA           |
| Asian (US) South<br>Asian (UK)             | 6%               | 7%           | 9%               | 5%           |
| Conservative<br>(US)/Tory (UK)**           | 31%              | 31%          | 28%              | 26%          |
| Liberal/Labour**                           | 33%              | 34%          | 35%              | 25%          |

U.S. population data is taken from the 2020 U.S. Census (<https://www.census.gov/quickfacts/fact/table/US/POP010210>). U.K. Census data is taken from the 2021 Census (<https://www.ons.gov.uk/peoplepopulationandcommunity/populationandmigration/populationestimates/bulletins/populationandhouseholdestimatesenglandandwales/census2021>). Note, the study oversampled non-White respondents by design. \*Level 3 UK education includes A-levels, University degrees, and various post-secondary professional certificates/diplomas. Data on UK education from “Education and Training Statistics for the UK” (<https://explore-education-statistics.service.gov.uk/find-statistics/education-and-training-statistics-for-the-uk>).\*\*Political ideology are population estimates taken from the 2021 General Social Survey (<https://gssdataexplorer.norc.org/variables/178/vshow>) and the 2019 British National Election Survey (<https://www.britishelectionstudy.com/data/#.Y476EC-B1Z0>).

**Table A1.25: Additional Summary Statistics by Country (Wave 2 sample)**

| <i>US Sample</i>     | N    | % of Sample |
|----------------------|------|-------------|
| White                | 625  | 51          |
| Black                | 169  | 14          |
| Latino               | 138  | 11          |
| Asian                | 82   | 7           |
| Other Race/Ethnicity | 215  | 17          |
| Female               | 665  | 54          |
| Male                 | 564  | 46          |
| University Degree    | 391  | 32          |
| Republican           | 317  | 26          |
| Democrat             | 466  | 38          |
| <i>UK Sample</i>     | N    | % of Sample |
| White                | 1063 | 83          |
| Black                | 63   | 5           |
| South Asian          | 61   | 5           |
| Arab                 | 10   | 1           |
| Chinese              | 12   | 1           |
| White Mixed          | 15   | 1           |
| Other Non-white      | 33   | 3           |
| Female               | 692  | 54          |
| Male                 | 484  | 46          |
| University Degree    | 432  | 34          |
| Tory Voter           | 338  | 27          |
| Labour Voter         | 311  | 24          |

**Table A1.26: Bayesian ANCOVA Results**

| US Sample                                                      | <i>Severe side effects</i> |                      |                      | <i>Harm Vulnerable</i>   |                      |                      |
|----------------------------------------------------------------|----------------------------|----------------------|----------------------|--------------------------|----------------------|----------------------|
|                                                                | <b>Model comparisons</b>   |                      | <b>Effects</b>       | <b>Model comparisons</b> |                      | <b>Effects</b>       |
|                                                                | BF <sub>M</sub>            | BF <sub>01</sub>     | BF(Excl)             | BF <sub>M</sub>          | BF <sub>01</sub>     | B(Excl)              |
|                                                                | US                         |                      |                      |                          |                      |                      |
| Baseline perceptions (T1)                                      | 20.84                      | 1                    | 5.77e <sup>-15</sup> | 16.77                    | 1                    | 2.67e <sup>-15</sup> |
| Discrediting by health professionals (vs. control)             | 1.43e <sup>-96</sup>       | 1.84e <sup>+96</sup> | 6.95                 | 7.18e <sup>-72</sup>     | 3.55e <sup>+71</sup> | 5.59                 |
| Baseline + discrediting mis-informants by health professionals | 0.43                       | 6.95                 | --                   | 0.54                     | 5.59                 | --                   |
| UK Sample                                                      | <i>Severe side effects</i> |                      |                      | <i>Harm Vulnerable</i>   |                      |                      |
|                                                                | <b>Model comparisons</b>   |                      | <b>Effects</b>       | <b>Model comparisons</b> |                      | <b>Effects</b>       |
|                                                                | BF <sub>M</sub>            | BF <sub>01</sub>     | BF(Excl)             | BF <sub>M</sub>          | BF <sub>01</sub>     | B(Excl)              |
| Baseline perceptions (T1)                                      | 28.65                      | 1                    | 8.44e <sup>-15</sup> | 30.46                    | 1                    | 0.00                 |
| Discrediting by health professionals (vs. control)             | 4.11e <sup>-82</sup>       | 6.29e <sup>-82</sup> | 9.55                 | 3.56e <sup>-72</sup>     | 7.59e <sup>+71</sup> | 10.16                |
| Baseline + discrediting mis-informants by health professionals | 0.31                       | 9.55                 | --                   | 0.30                     | 10.16                | --                   |

Results from Bayesian ANCOVA models. Note: e stands for \* 10

**Figure A1.1: Effects of Treatment Conditions on Respondent Beliefs**

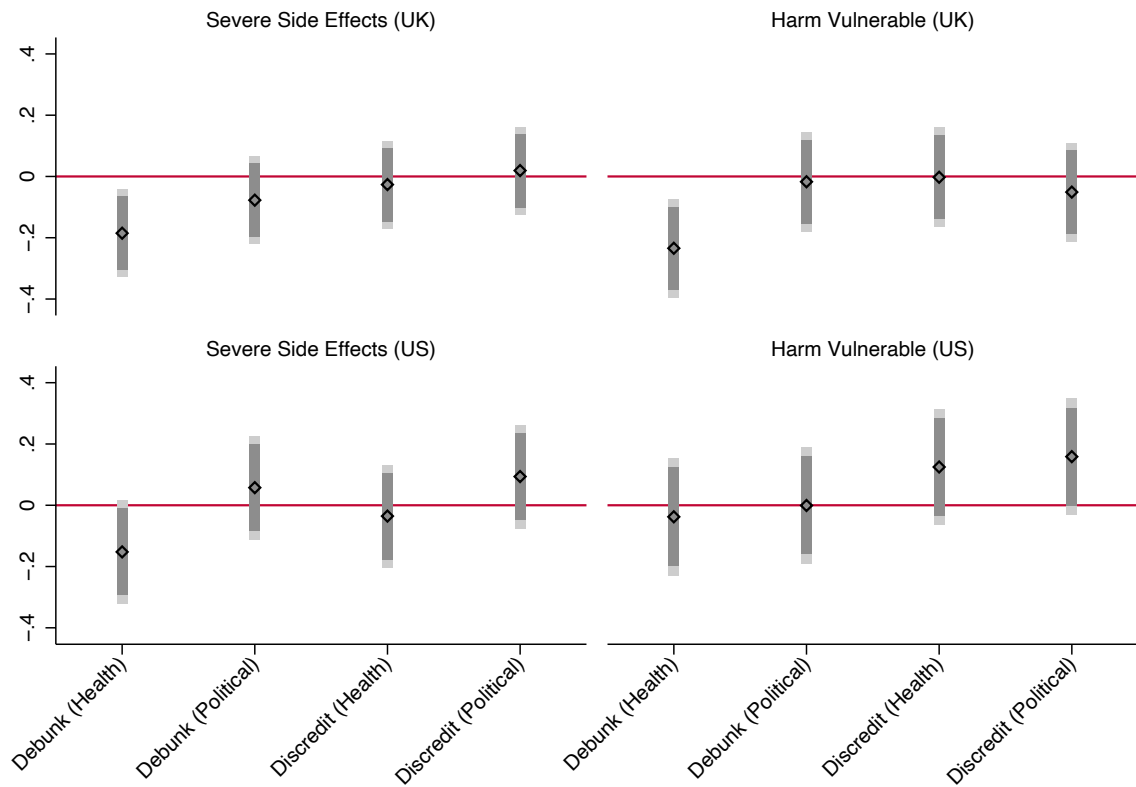

Regression coefficients (black diamonds) with 90% (dark grey bars) 95% (light grey bars) confidence interval from Ordinary Least Squares (OLS) models predicting the influence of treatment conditions (x-axis) on respondent beliefs about vaccine risks (y-axis), controlling for respondent beliefs observed in pre-treatment study wave.

**Figure A1.2: Pre-treatment Respondent Beliefs**

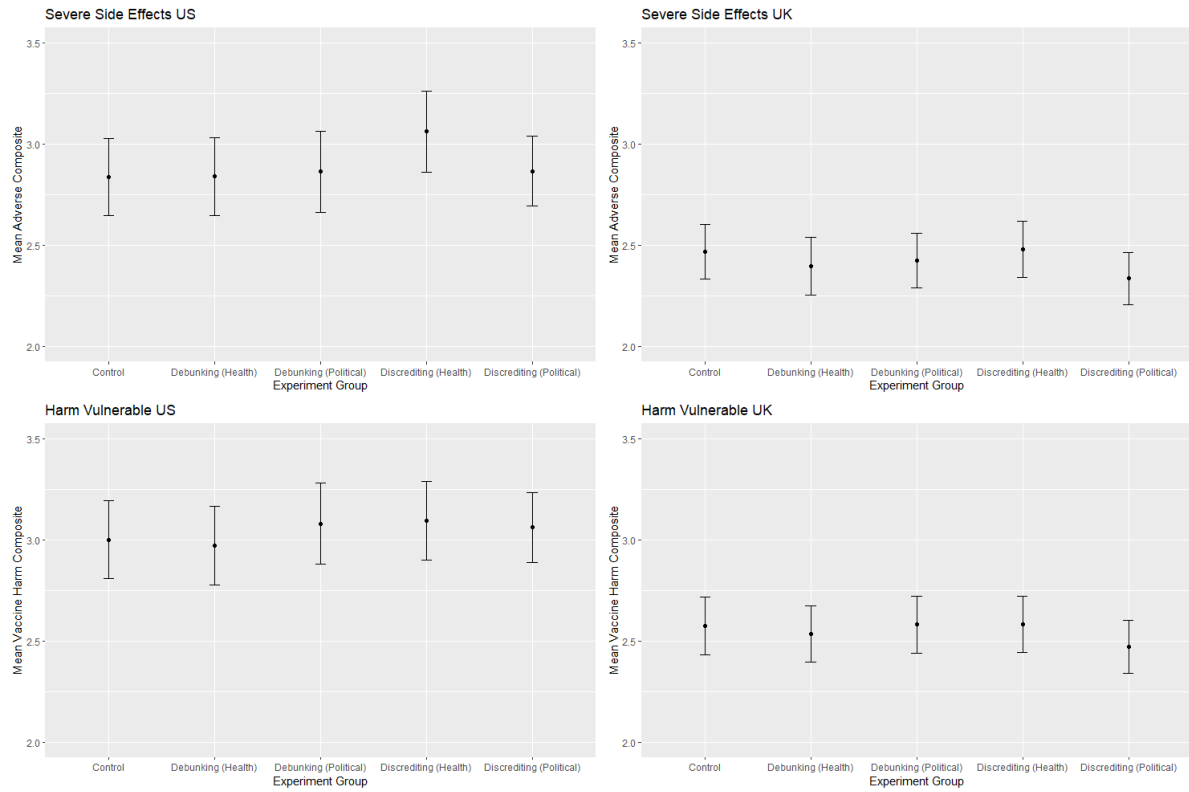

Means by condition (dots) with 95% CIs (vertical lines).

**Figure A1.3: Change between Pre-treatment and Post-treatment Respondent Beliefs**

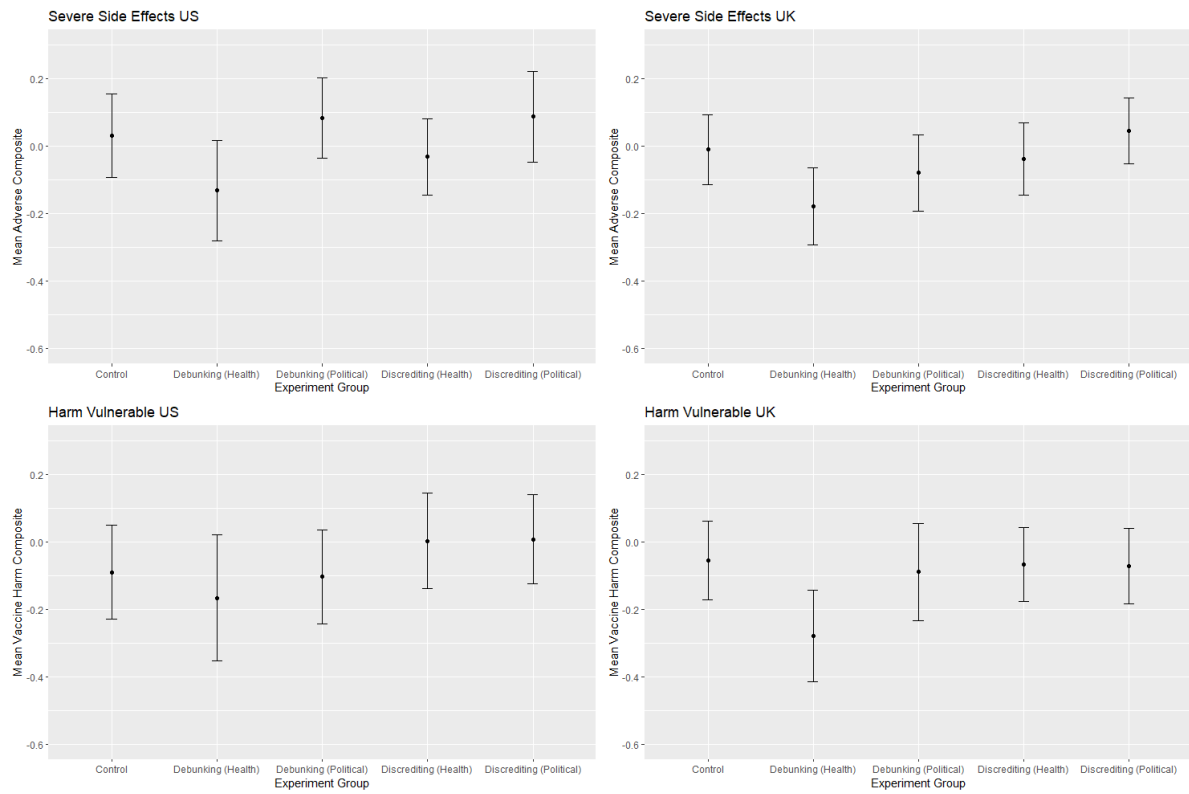

Change in means (Wave 2 – Wave 1) by condition (dots) with 95% CIs (vertical lines).

Figure A1.4: Conditional Effect of Vaccination Status - Debunking (Health)

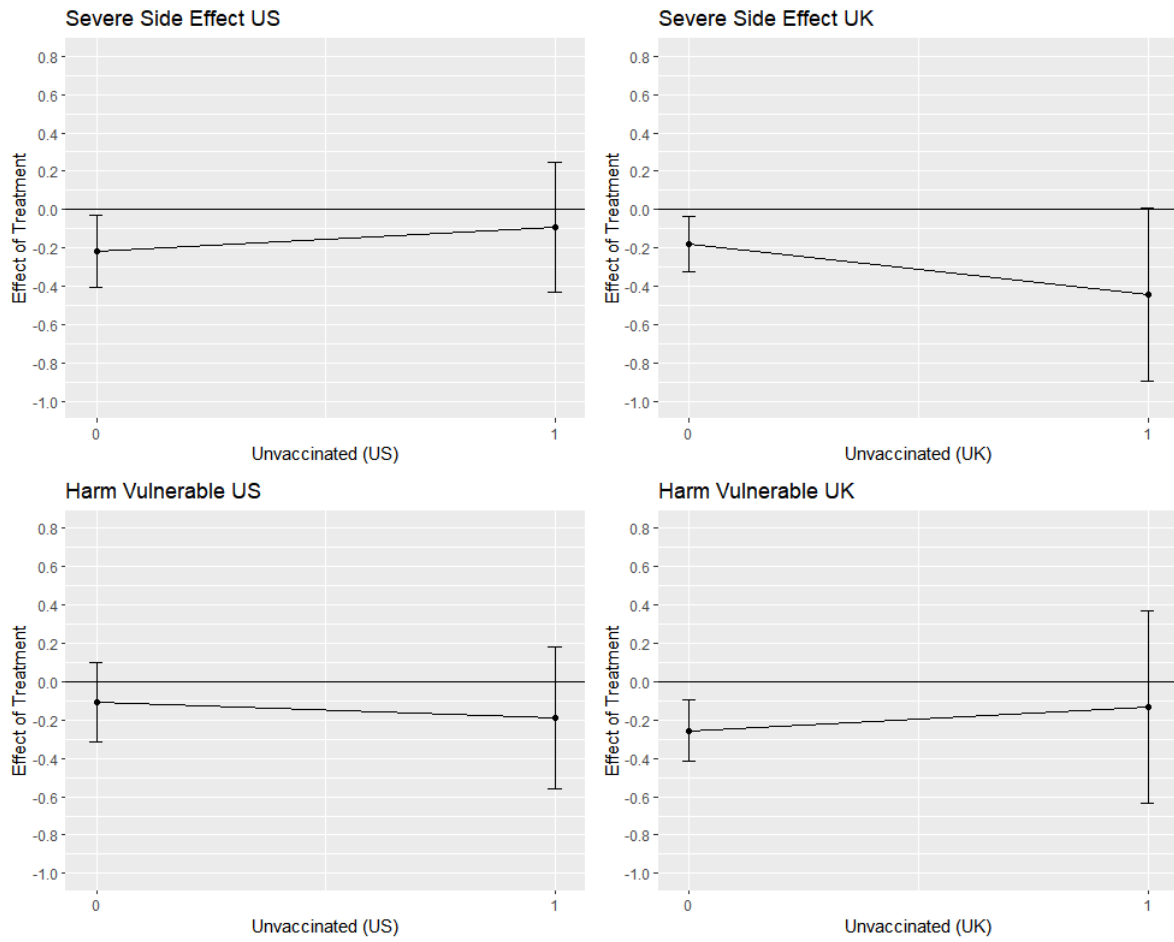

Plots of the marginal effect of treatment condition by vaccination status (unvaccinated=1). Black line depicts effect of treatment group relative to control group. Grey shading represents 95% confidence intervals.



Figure A1.5: Conditional Effect of Vaccination Status- Debunking (Political)

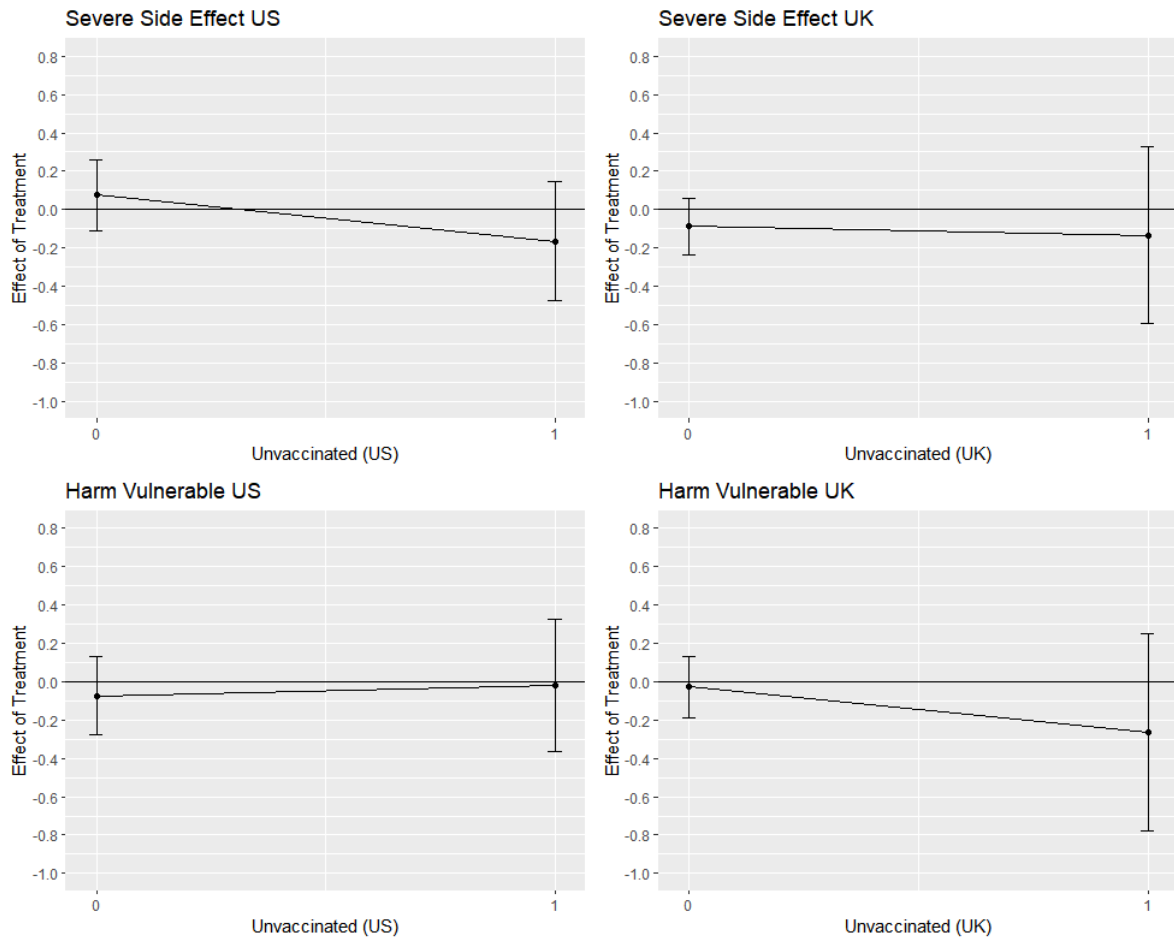

Plots of the marginal effect of treatment condition by vaccination status (unvaccinated=1). Black line depicts effect of treatment group relative to control group. Grey shading represents 95% confidence intervals.

Figure A1.6: Conditional Effect of Vaccination Status - Discrediting (Health)

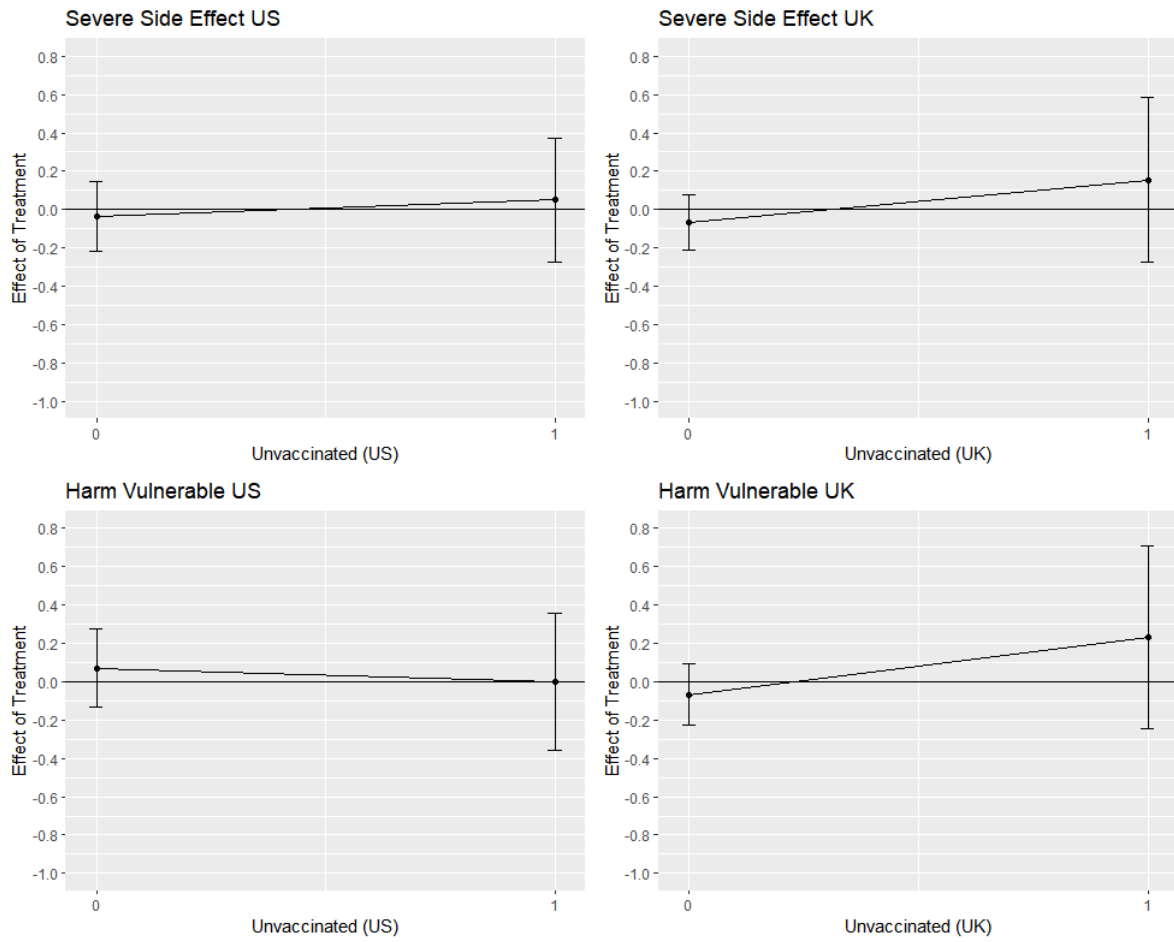

Plots of the marginal effect of treatment condition by vaccination status (unvaccinated=1). Black line depicts effect of treatment group relative to control group. Grey shading represents 95% confidence intervals.

Figure A1.7: Conditional Effect of Vaccination Status - Discrediting (Political)

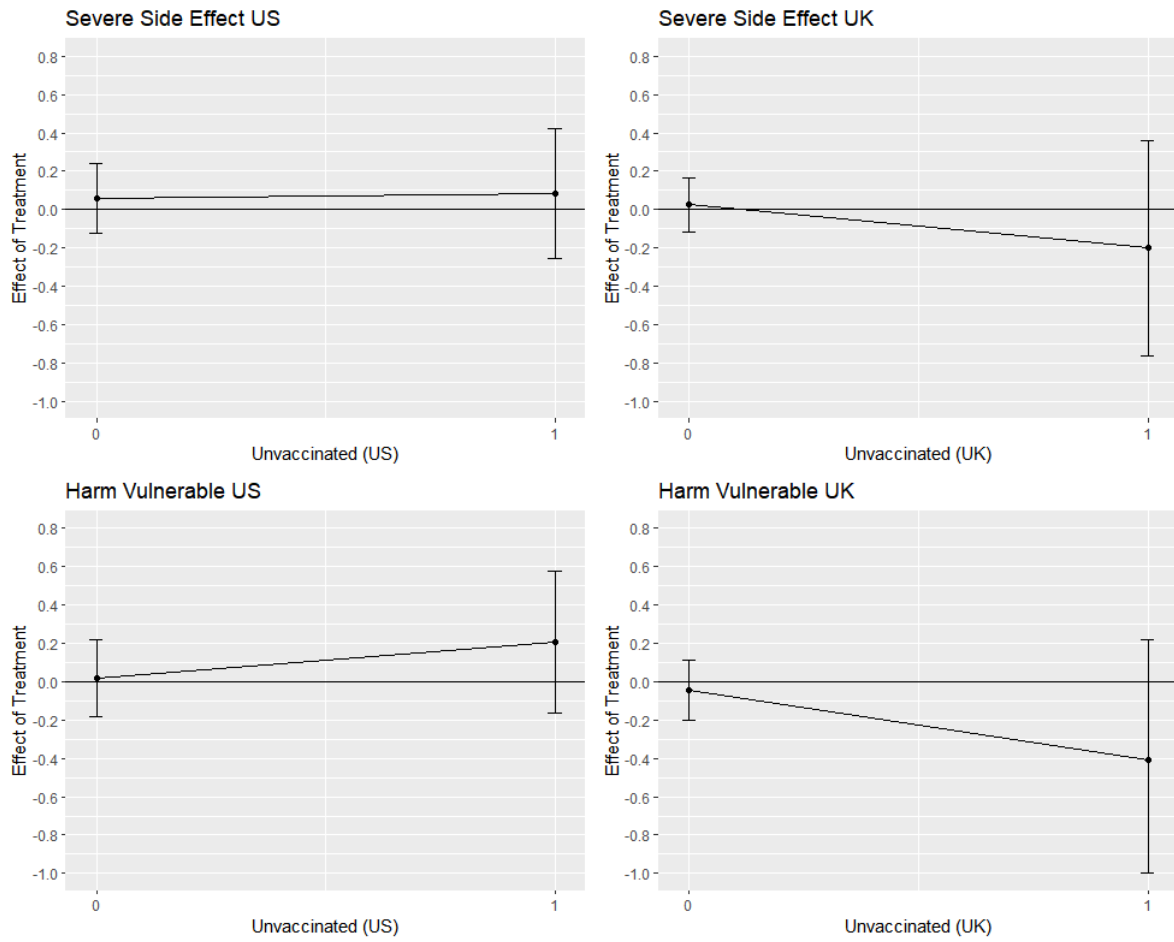

Plots of the marginal effect of treatment condition by vaccination status (unvaccinated=1). Black line depicts effect of treatment group relative to control group. Grey shading represents 95% confidence intervals.

**Figure A1.8: Conditional Effect of Political Ideology - Debunking (Health)**

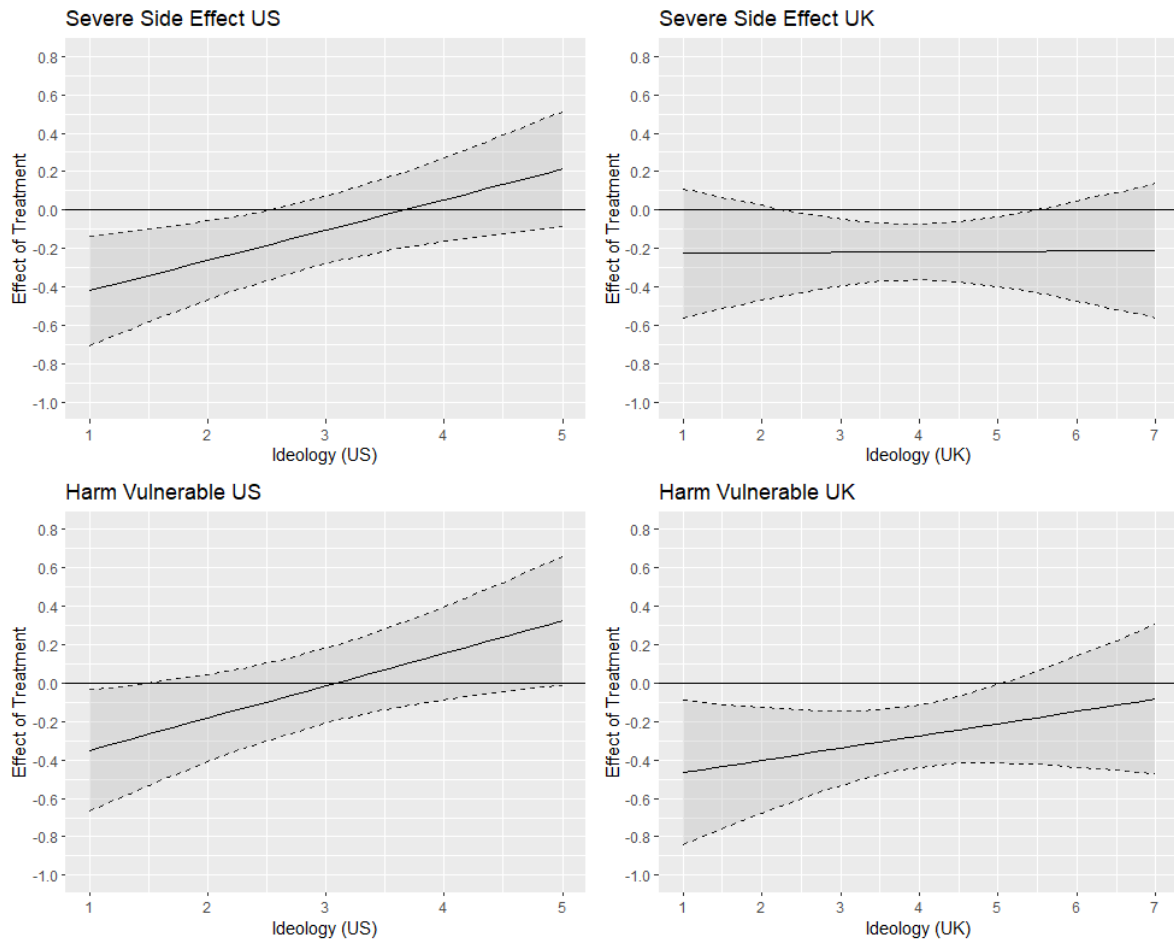

Plots of the marginal effect of treatment condition over the scale of respondent political ideology (Liberal-Conservative). Black line depicts effect of treatment group relative to control group. Grey shading represents 95% confidence intervals. Based on the results from OLS models interacting Political Ideology and specified treatment condition.

**Figure A1.9: Conditional Effect of Ideology - Debunking (Political)**

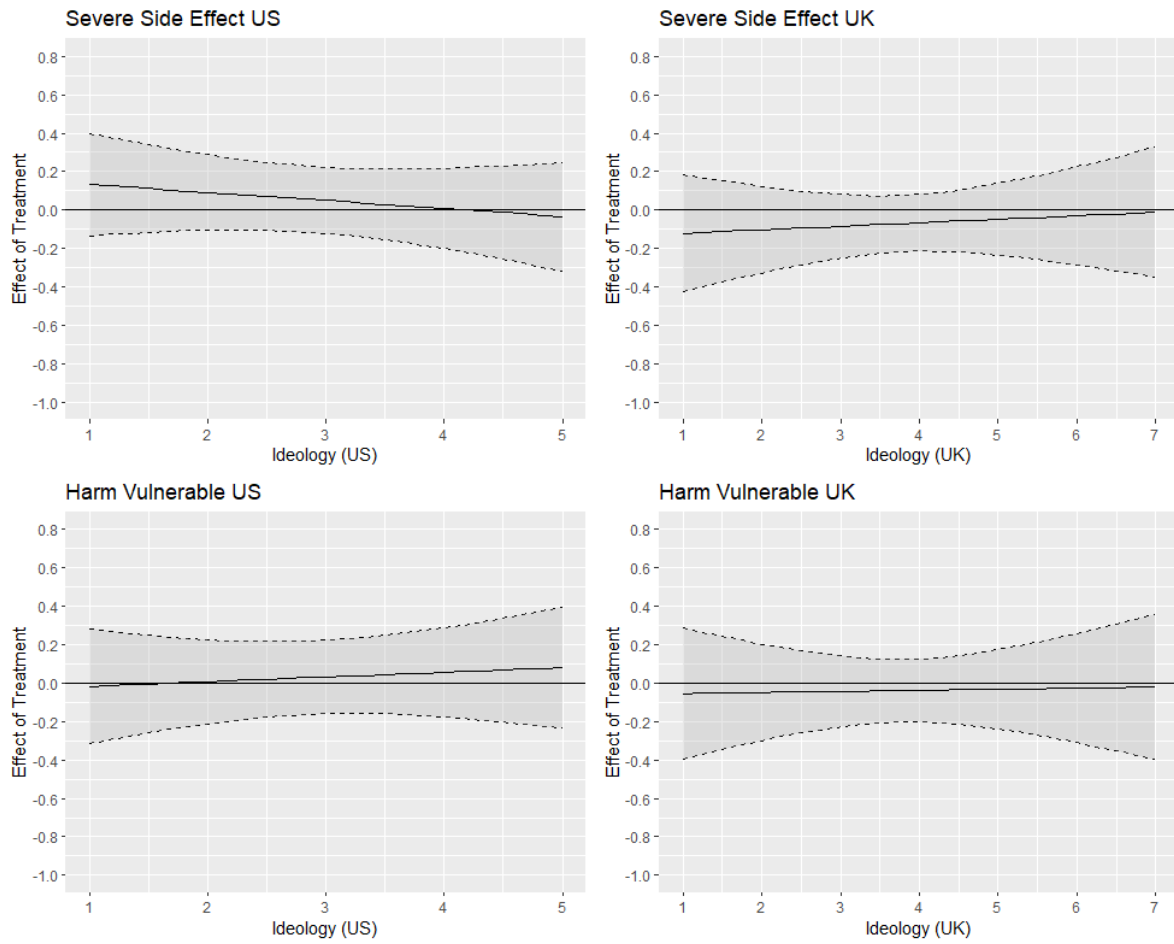

Plots of the marginal effect of treatment condition over the scale of respondent political ideology (Liberal-Conservative). Black line depicts effect of treatment group relative to control group. Grey shading represents 95% confidence intervals. Based on the results from OLS models interacting Political Ideology and specified treatment condition.

Figure A1.10: Conditional Effect of Ideology - Discrediting (Health)

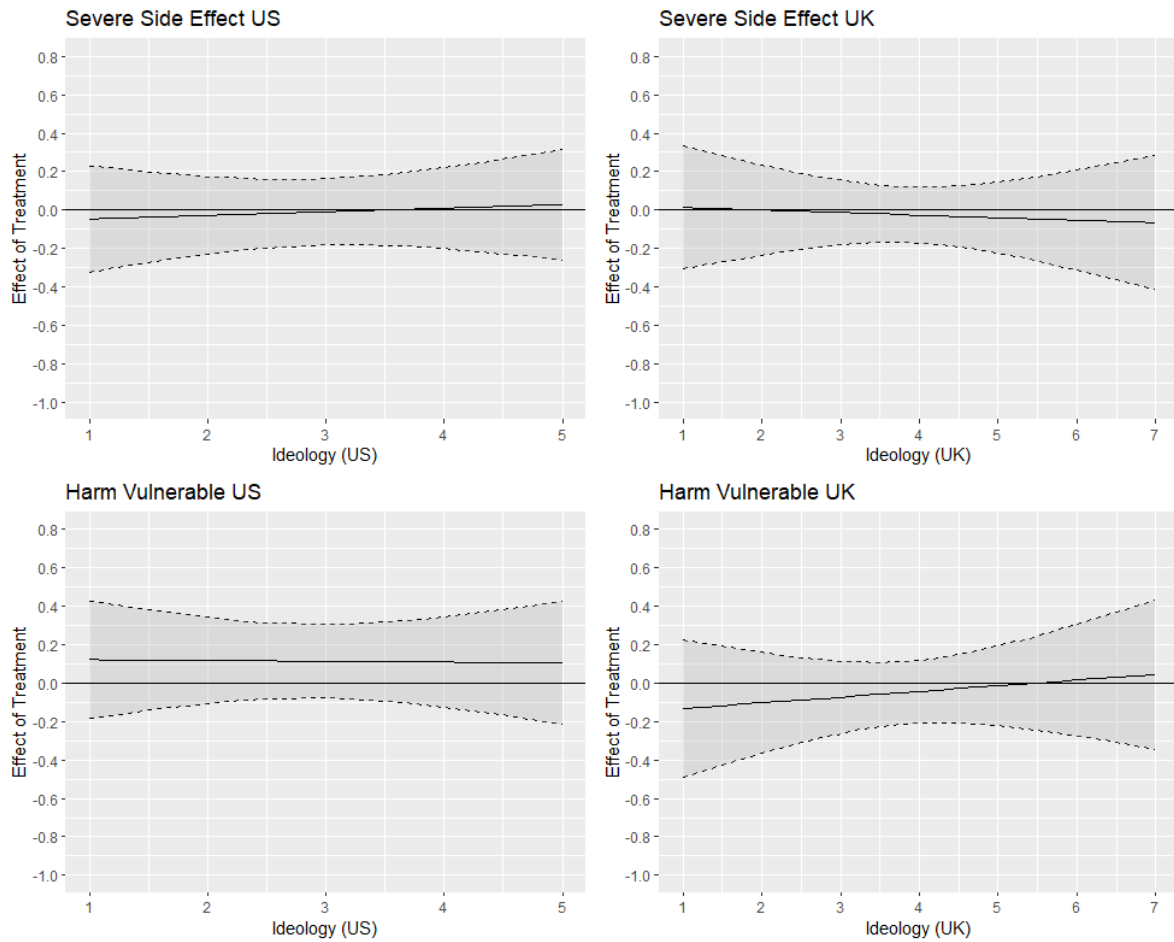

Plots of the marginal effect of treatment condition over the scale of respondent political ideology (Liberal-Conservative). Black line depicts effect of treatment group relative to control group. Grey shading represents 95% confidence intervals. Based on the results from OLS models interacting Political Ideology and specified treatment condition.

**Figure A1.11: Conditional Effect of Ideology - Discrediting (Political)**

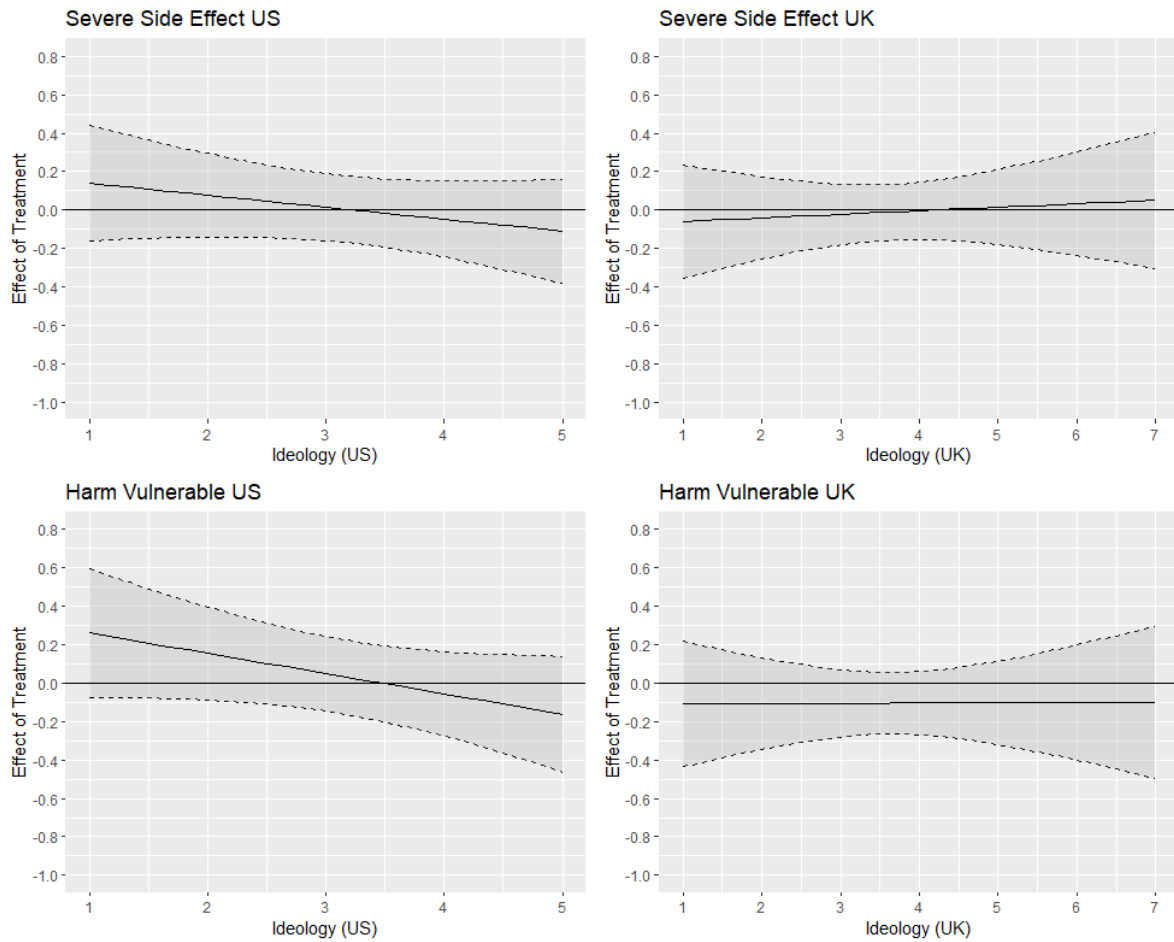

Plots of the marginal effect of treatment condition over the scale of respondent political ideology (Liberal-Conservative). Black line depicts effect of treatment group relative to control group. Grey shading represents 95% confidence intervals. Based on the results from OLS models interacting Political Ideology and specified treatment condition.

**Figure A1.12: Moderating Effect of Wave 1 Vaccine Attitudes on the Relationship between Treatments and Wave 2 Value of *Severe Side Effects* (US Respondents)**

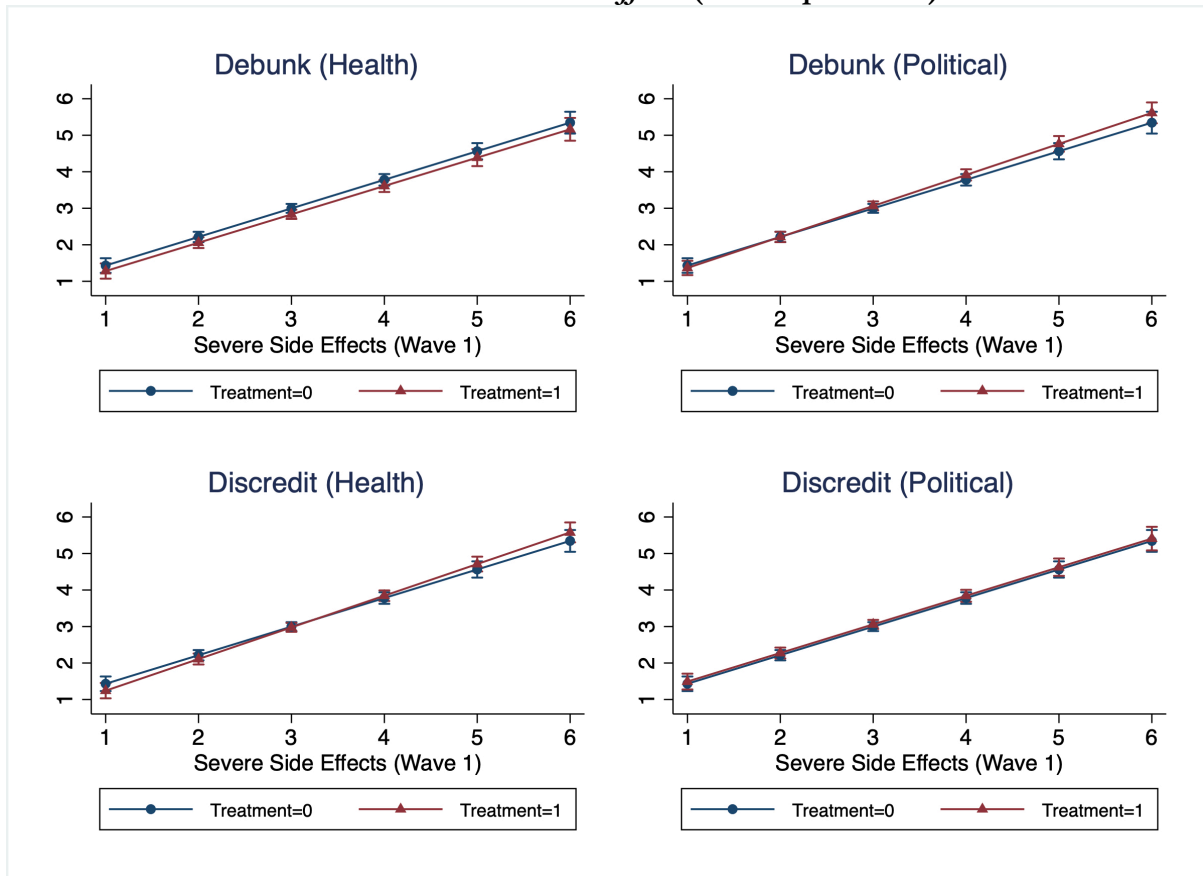

Figure plots predicted probabilities from OLS models interacting the stated treatment condition with respondents' Wave 1 vaccine attitudes. The predictions illustrate the effects of the specified treatment on respondents' vaccine attitude recorded in Wave 2 over the attitude recorded in Wave 1. Circles and triangles represent point estimates for the observed value of *Severe Side Effects* in Wave 2 while vertical capped bars represent 95% CIs.



**Figure A1.13: Moderating Effect of Wave 1 Vaccine Attitudes on the Relationship between Treatments and Wave 2 Value of *Harm Vulnerable* (US Respondents)**

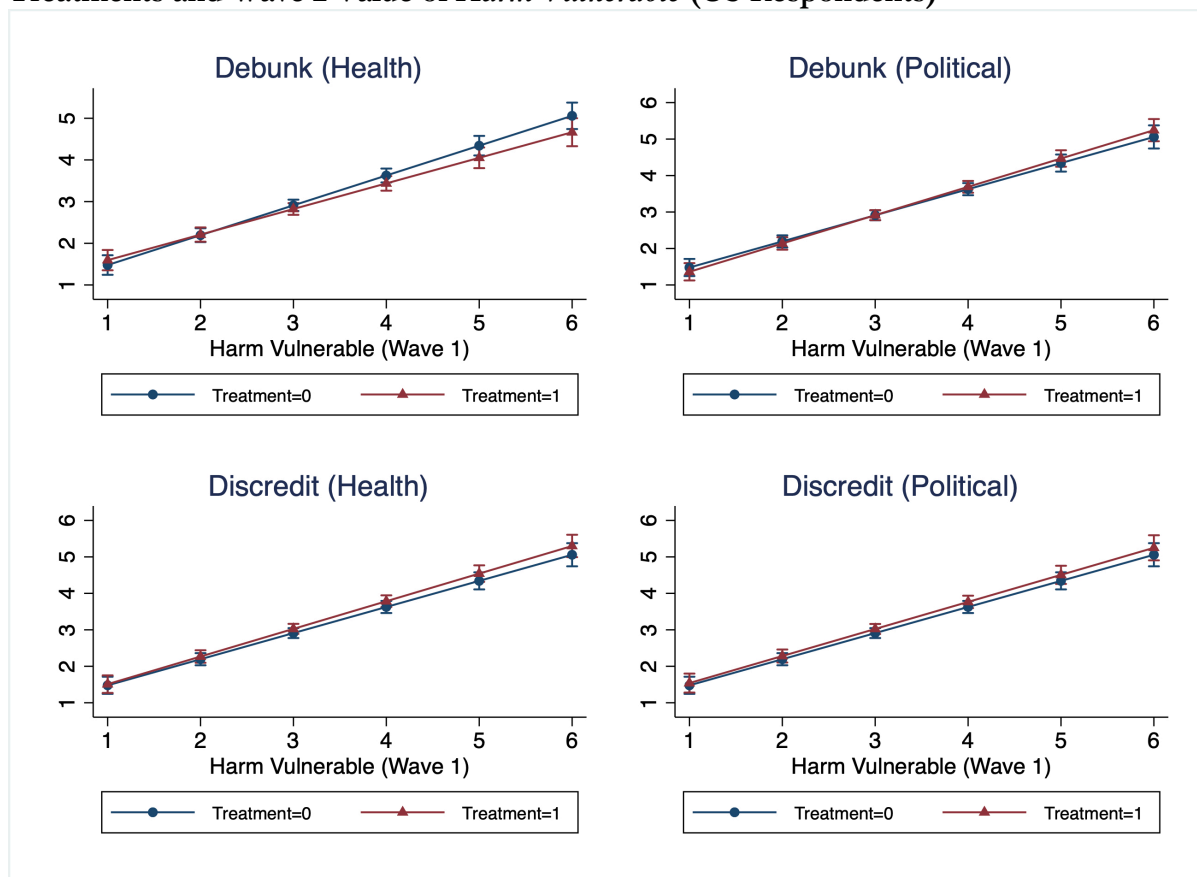

Figure plots predicted probabilities from OLS models interacting the stated treatment condition with respondents' Wave 1 vaccine attitudes. The predictions illustrate the effects of the specified treatment on respondents' vaccine attitude recorded in Wave 2 over the attitude recorded in Wave 1. Circles and triangles represent point estimates for the observed value of *Harm Vulnerable* in Wave 2 while vertical capped bars represent 95% CIs.

**Figure A1.14: Moderating Effect of Wave 1 Vaccine Attitudes on the Relationship between Treatments and Wave 2 Value of *Severe Side Effects* (UK Respondents)**

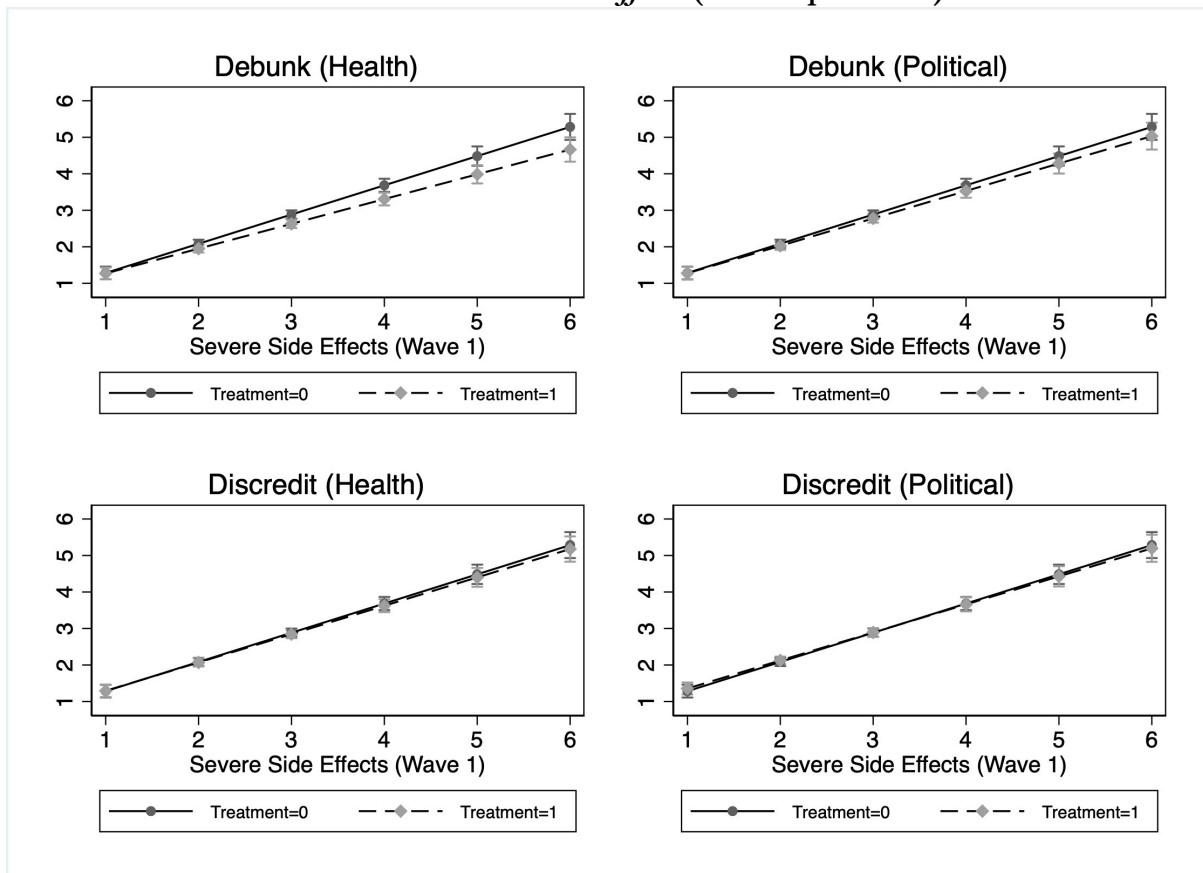

Figure plots predicted probabilities from OLS models interacting the stated treatment condition with respondents' Wave 1 vaccine attitudes. The predictions illustrate the effects of the specified treatment on respondents' vaccine attitude recorded in Wave 2 over the attitude recorded in Wave 1. Circles and diamonds represent point estimates for the observed value of *Severe Side Effects* in Wave 2 while vertical capped bars represent 95% CIs.

**Figure A1.15: Moderating Effect of Wave 1 Vaccine Attitudes on the Relationship between Treatments and Wave 2 value of *Harm Vulnerable* (UK Sample)**

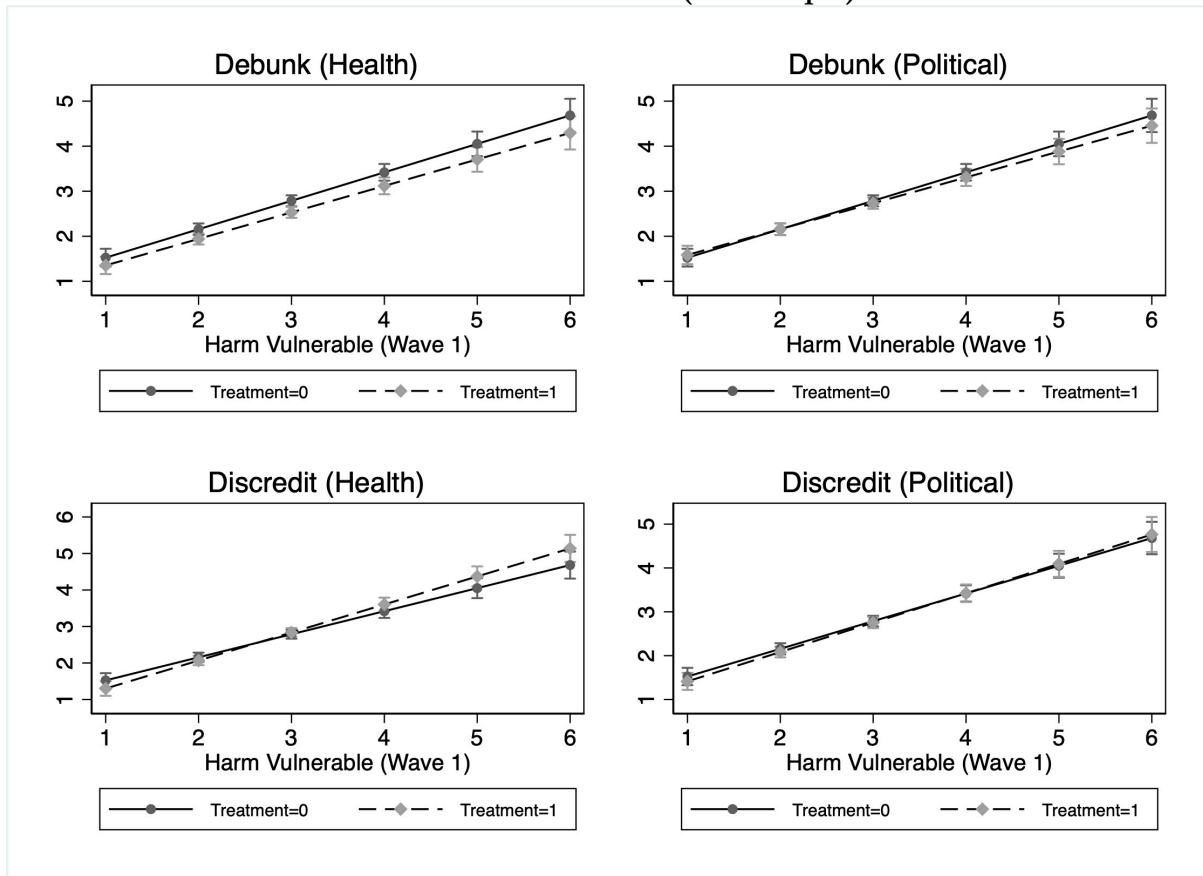

Figure plots predicted probabilities from OLS models interacting the stated treatment condition with respondents' Wave 1 vaccine attitudes. The predictions illustrate the effects of the specified treatment on respondents' vaccine attitude recorded in Wave 2 over the attitude recorded in Wave 1. Circles and diamonds represent point estimates for the observed value of *Harm Vulnerable* in Wave 2 while vertical capped bars represent 95% CIs.

**Figure A1.16: Effects of Treatments on Respondent Beliefs about COVID-19 Vaccines (Imputed Data)**

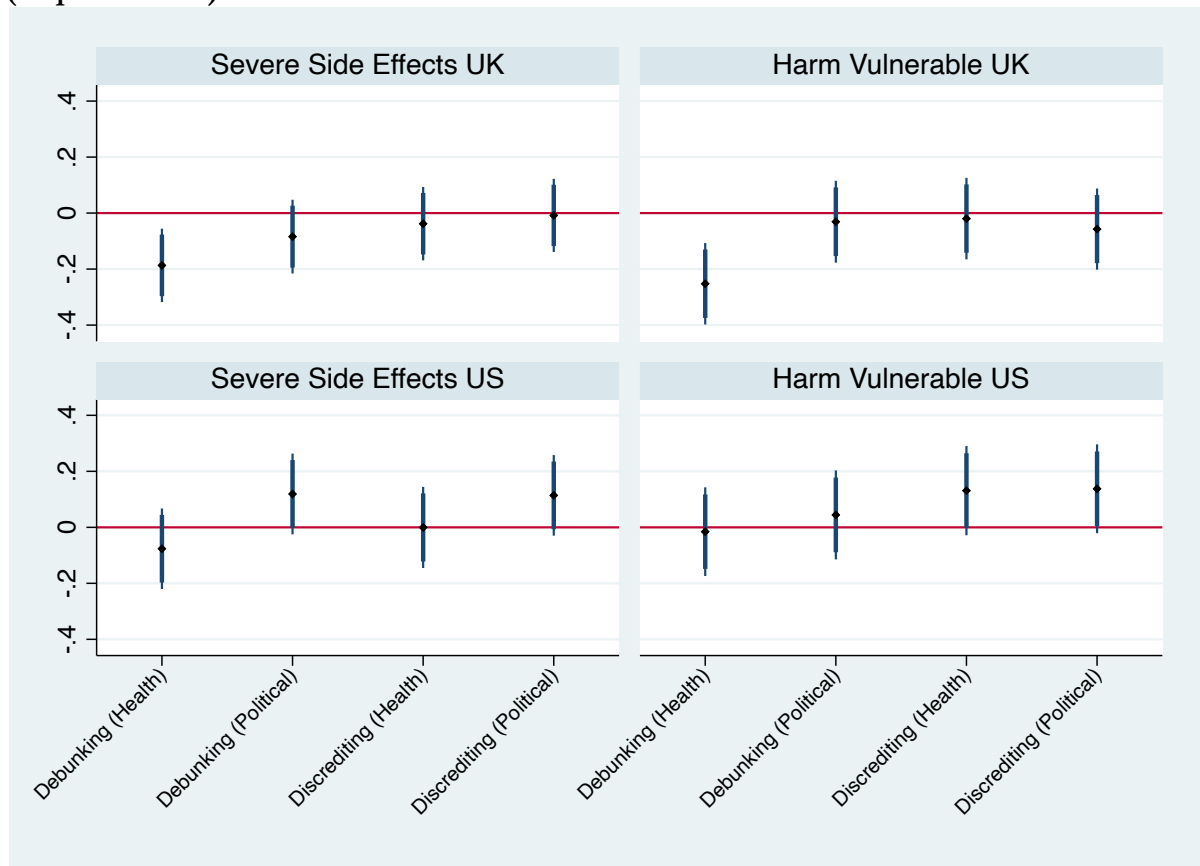

Regression coefficients (black dots) with 90% (thick bars) 95% (thin bars) confidence interval from Ordinary Least Squares (OLS) models predicting the influence of treatment conditions (x-axis) on respondent beliefs about vaccine risks (y-axis), controlling for respondent beliefs observed in pre-treatment study wave. Missing observations imputed from 100 simulations using MCMC draws from a joint MVN distribution.

**Figure A1.17: Moderating Effect of Political Ideology on the Relationship between Debunking by Health Professionals and Respondent Vaccine Beliefs (Imputed Data)**

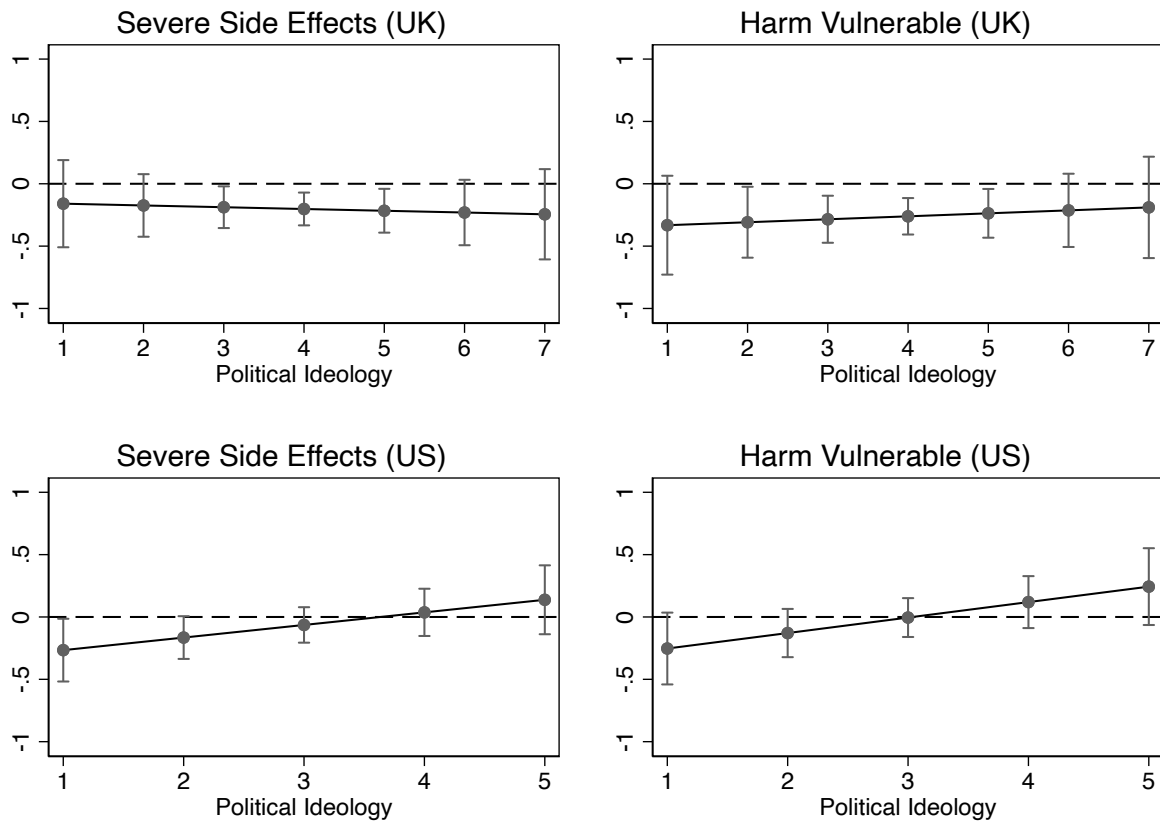

Plots of the marginal effect (y-axis) of debunking treatment attributed to healthcare professionals over the scale of respondent political ideology (Liberal-Conservative) (x-axis). Black line depicts effect of treatment group relative to control group. Capped vertical lines represent 95% confidence intervals. Based on the results from OLS models interacting Political Ideology and specified treatment condition.

**Figure A1.18: Conditional Effect of Vaccination Status-Debunking (Health) (Imputed Data)**

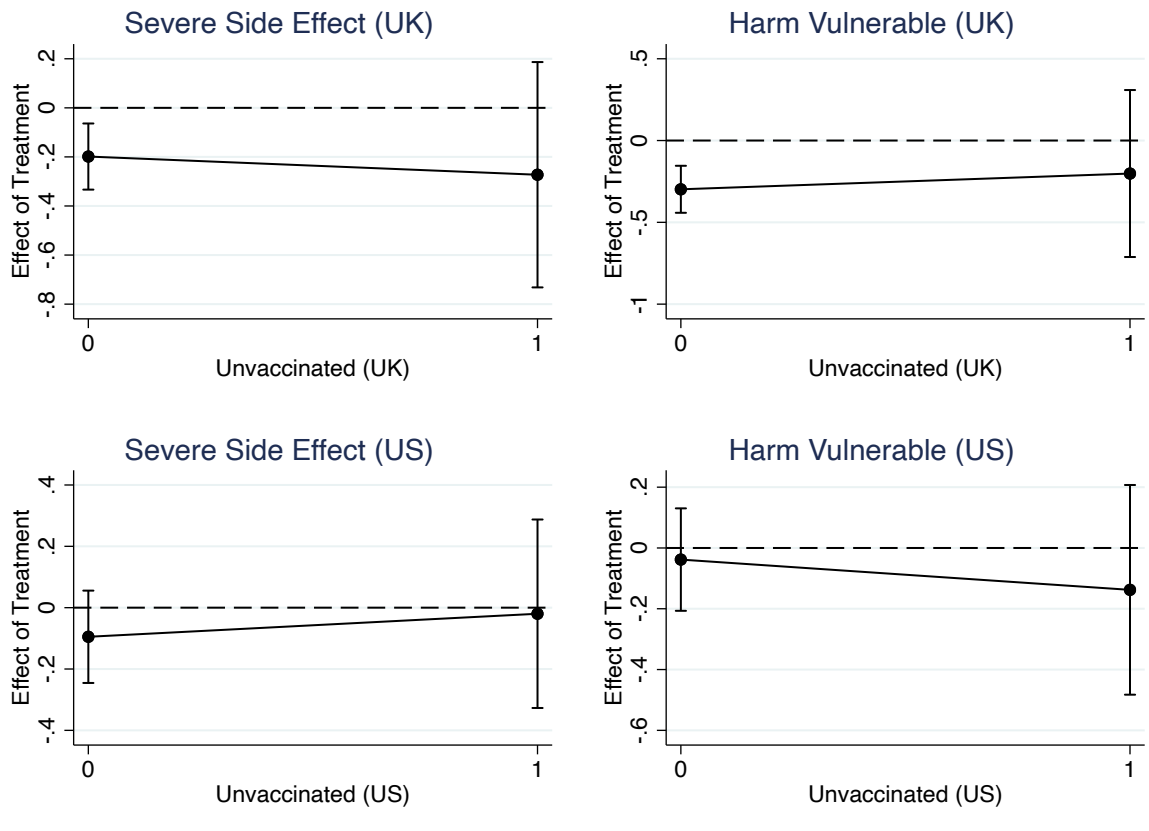

Plots of the marginal effect of treatment condition over the scale of respondent political ideology (Liberal-Conservative). Black line depicts effect of treatment group relative to control group. Grey shading represents 95% confidence intervals. Based on the results from OLS models interacting Vaccine Status and specified treatment condition.

Figure A1.19: Direct Comparison to Political Authority-Discrediting

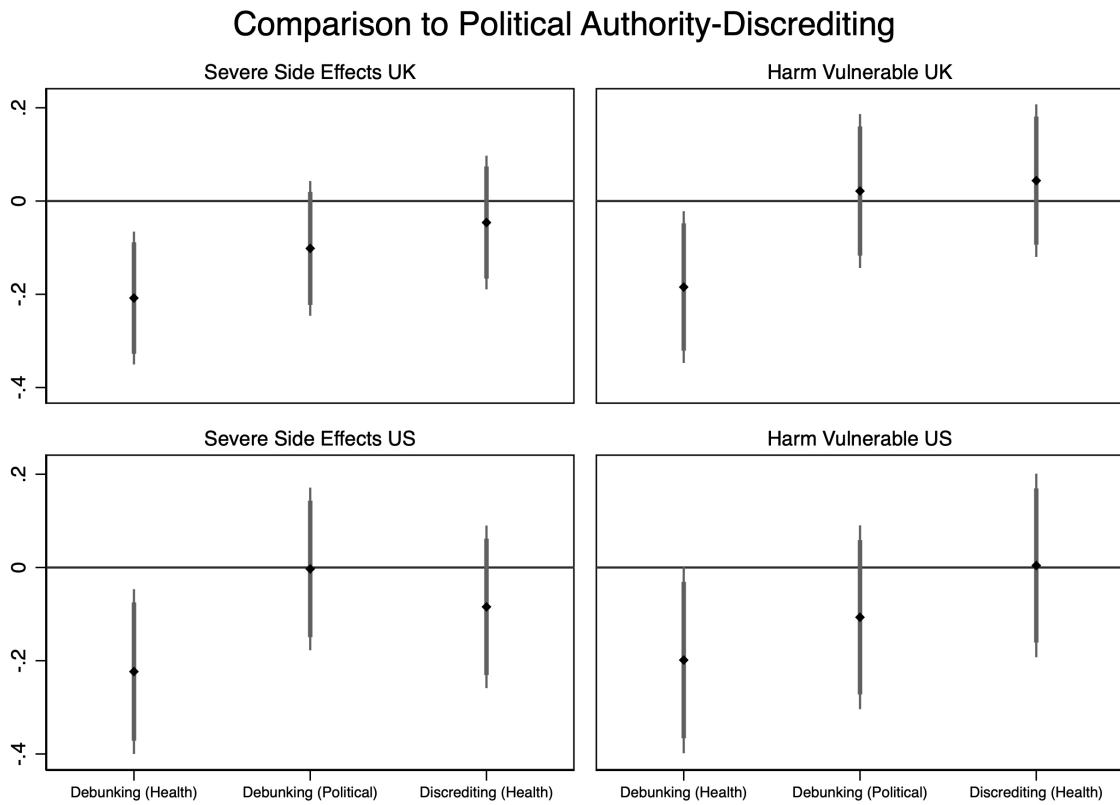

Coefficients estimates (black diamonds) with 90% (thick bars) 95% (thin bars) CIs from OLS models predicting the effect of treatment conditions (x-axis) on respondent beliefs about vaccine risks (y-axis), controlling for respondent beliefs in pre-treatment study wave. *Discrediting (Political)* represents the excluded category to which other treatment conditions are compared. We exclude the control condition reported in the paper from these analyses.

Figure A1.20: Direct Comparison to Political Authority-Discrediting

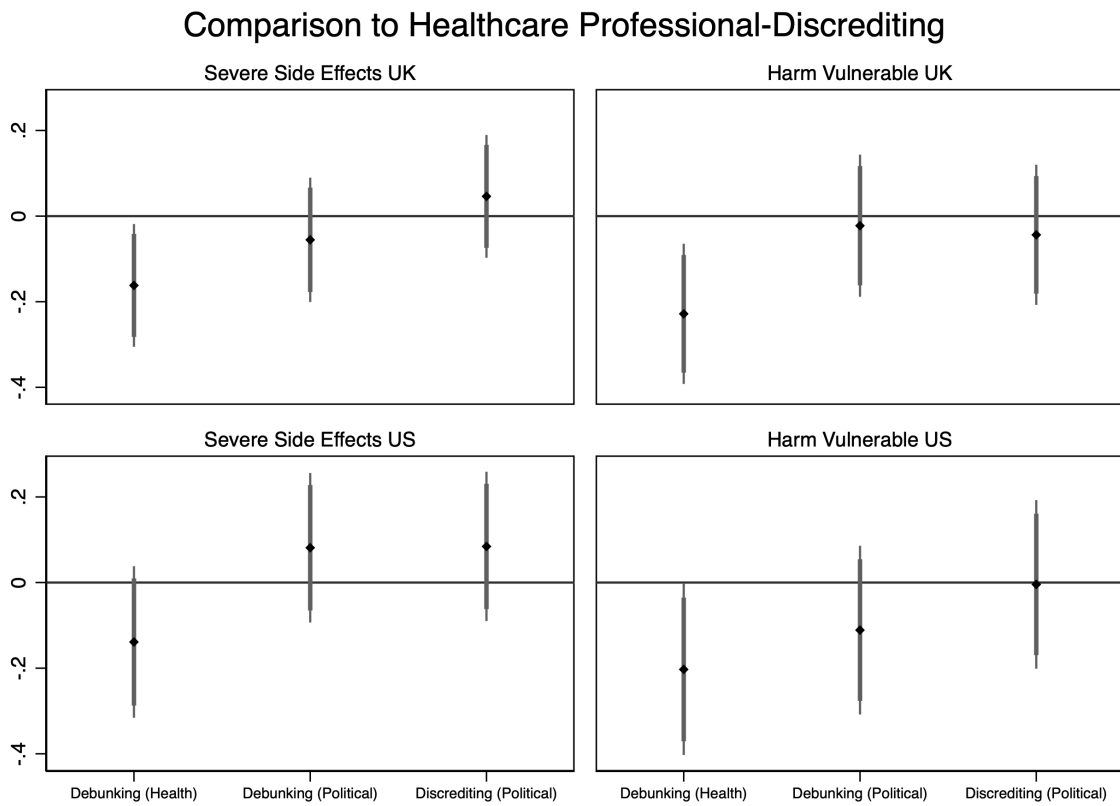

Coefficients estimates (black diamonds) with 90% (thick bars) 95% (thin bars) CIs from OLS models predicting the effect of treatment conditions (x-axis) on respondent beliefs about vaccine risks (y-axis), controlling for respondent beliefs in pre-treatment study wave. *Discrediting (Health)* represents the excluded category to which other treatment conditions are compared. We exclude the control condition reported in the paper from these analyses.



Figure A1.20: Direct Comparison to Political Authority-Discrediting

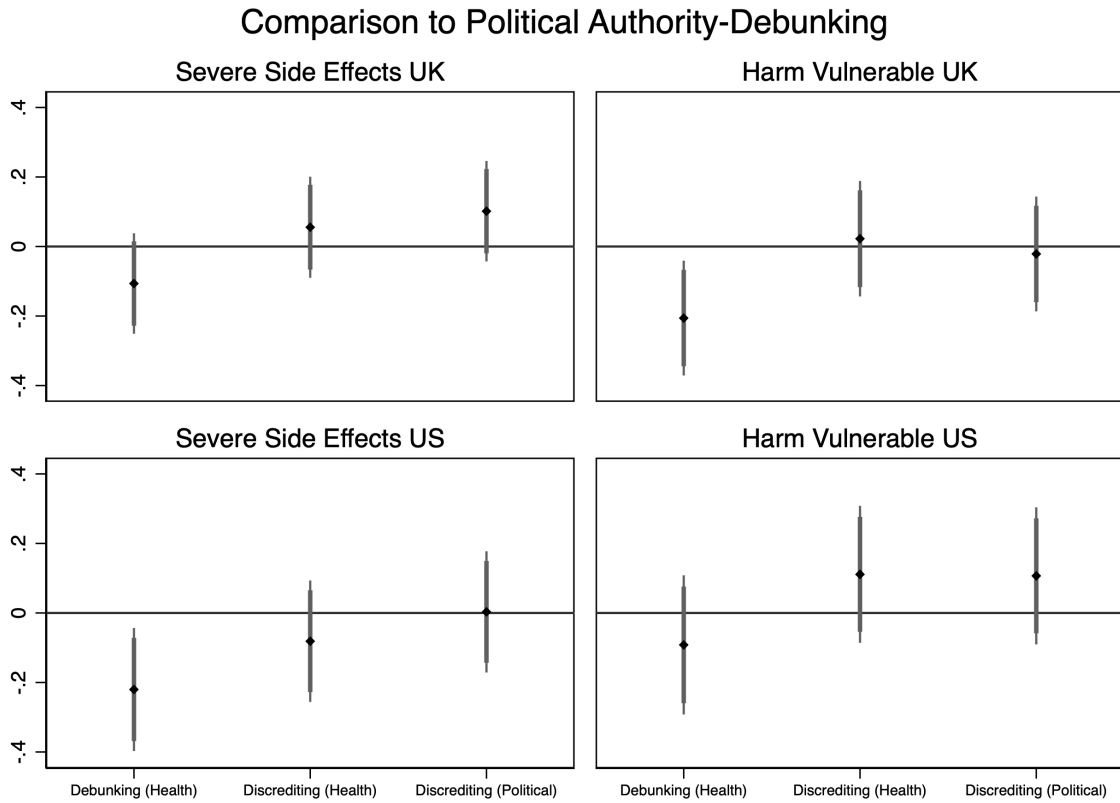

Coefficients estimates (black diamonds) with 90% (thick bars) 95% (thin bars) CIs from OLS models predicting the effect of treatment conditions (x-axis) on respondent beliefs about vaccine risks (y-axis), controlling for respondent beliefs in pre-treatment study wave. *Debunking (Political)* represents the excluded category to which other treatment conditions are compared. We exclude the control condition reported in the paper from these analyses.

## Additional Notes and Comments

### **Data imputation and Analysis**

Missing data derives from two sources in our analysis. The first results from respondent attrition between Wave 1 and Wave 2 of the survey: some respondents who completed the first wave of the survey did not complete the second wave of the survey. This amounts to 1,381 missing cases for all the variables measured in Wave 2 (UK=650; US=731) from the original sample of 5,900 who completed fully the wave 1 survey (UK=2,953; US=2,947). This gives us an impressive recontact rate of 77%. In this second wave, 55% of these successful recontacts were randomly assigned to one of five experimental conditions used in this study (described below); the remaining recontacts were reserved for a different study.

The missing cases—those that were not successfully re-contacted—were originally subjected to listwise deletion in the analyses, meaning they were simply excluded from the analyses. To address this issue, we impute values on the 1,381 missing cases of respondents from Wave 1 who did not complete Wave 2 for this study. These are the only cases of missing observations on our outcome variables (*Severe Side Effects* and *Harm Vulnerable*). To account for missing observations on the DVs, we first estimated whether the respondent is missing in Wave 2 based on observed variables from Wave 1, including the Wave 1 measures of the missing outcome variables.<sup>1</sup> Older and less educated respondents were less likely to return for Wave 2 of the study, but there is no indication that missingness is related to our outcome variables, which were measured and tested for all respondents in Wave 1. Thus, we conclude that the data is missing at random (MAR)—in other words, attitudes toward vaccines did not influence the probability of successful recontact.

Given that missing at random data might result in biased estimates using listwise deletion (Sidi and Harel 2018), we used multiple imputation to estimate those missing values for the second wave of the survey using values on those exact variables from Wave 1 of the survey, as well as theoretically relevant variables as recommended by Enders (2010) (also see White 2011).<sup>2</sup> Because we have data for each missing respondent on each outcome in wave 1 of the survey, our imputation model is likely to yield valid estimates of the missing data in wave 2 (e.g., wave 1 and wave 2 values are highly correlated 0.75 [*Severe Side Effects*] and 0.68 [*Harm Vulnerable*]).

We performed 100 simulations using Markov Chain Monte Carlo draws from a joint multivariate normal distribution (Lee and Carlin 2010). This resulted in imputed values on each outcome in wave two of the survey for our two key outcome variables: *Severe Side Effects* and *Harm Vulnerable*. Since these cases were untreated (i.e., those participants were not allocated to any of the experimental conditions), we relegate them to the control group of the study and re-estimate the regression model in the manuscript. The results are shown in figure **SA1.16**. The conclusions remain unchanged from when we excluded these observations from the data. We therefore conclude that the absence of the cases that failed to return for Wave 2 did not bias our results.<sup>3</sup>

---

<sup>1</sup> This model includes beliefs about severe side effects of vaccines, Harm Vulnerable (w1)vulnerability, trust in healthcare professionals, trust in the national government, social reactance, authoritarianism, political ideology, age, gender, social media use, income, race, and education.

<sup>2</sup> The auxiliary variables in the imputation equation consists of the observed values of each missing case measured in wave 1 of the survey (severe side effects and harm vulnerability), trust in the national government, trust in healthcare professionals, vaccination status, social media use, gender, age, authoritarianism, and social reactance. We did not find that changes to the auxiliary equation altered the results of the impute values nor did it alter the efficiency of estimates. Trace plots and diagnostic tests suggest stable convergence in each model.

<sup>3</sup> These results also replicate when we use Multiple Imputation Chained Equations (MICE) as an alternative to the multivariable normal Markov Chain Monte Carlo imputation method (White et al. 2011).

The second source of missing data concerns sociodemographic characteristics, specifically political ideology. Some respondents in the conditional models reported in Figure 3 of the paper did not select a political ideology. Among successful recontacts for Wave 2, we record 73 missing observations for political ideology among UK respondents and 109 missing observations for US respondents. These missing observations were imputed using the same methodology as described above. Figure SA1.17 shows the moderating effect of political ideology on the relationship between debunking by health professionals and respondent vaccine beliefs using the imputed data. These estimates are similar to those reported when listwise deletion is used with one exception: political ideology no longer moderates the relationship between debunking by health care professionals and harm vulnerability beliefs in the UK at the extreme left category. However, it does moderate beliefs at less extreme left categories similar to when listwise deletion is used. We therefore conclude that the results are highly similar and largely unaffected by missingness in the data.

Next, like the ideology variables, we observe some missing on the variable accounting for vaccine status (*Unvaccinated*). There are 24 missing observations for this variable in Wave 2 in the US sample and 79 missing observations in the US sample. Because we use this variable as a predictor (particularly to interact with the treatments) in our analyses, we likewise impute the missing values and rerun the analyses. As before, the using these imputed values does not affect the results of the models, and in this case, we continue to find that vaccination status does not moderate the relationship between the treatments and respondents' Wave 2 beliefs (see SA1.18 in the appendix).

Enders, Craig K. 2010. *Applied Missing Data Analysis*. The Guilford Press. New York.

Lee, Katherine J. and John B. Carlin. 2010. "Multiple Imputation for Missing Data: Fully Conditional Specification versus Multivariate Normal Imputation." *American Journal of Epidemiology*, 171(5): 624-632.

Sidi, Yulia and Ofer Harel. 2018. "The Treatment of Incomplete Data: Reporting, Analysis, Reproducibility, and Replicability." *Social Science & Medicine*, 209: 169-173.

White, Ian R., Patrick Royston, and Angela M. Wood. 2011. "Multiple Imputation using Chained Equations: Issues and Guidance for Practice." *Statistics in Medicine*, 30(4): 377-399.

## Effect size and statistical power

Using the software G\*Power (Faul et al. 2007), we conducted three sensitivity analyses on our analytical samples (i.e., the participants for whom we have data for time 1 and time 2). We conducted one sensitivity analysis for the UK sample, one for the US sample, and one for the overall sample. We conducted the sensitivity analyses for linear multiple regressions focusing on  $R^2$  increase, including four main predictors (resulting from the comparisons of our four experimental conditions to the control one) and a total number of five predictors (the four main predictors and a covariate representing participants' baseline vaccination status or vaccine risk attitudes).

Assuming power=0.8 and alpha=0.05, the sensitivity analyses showed that we could identify an effect size of  $f^2 = 0.010$  to test our hypotheses in the UK sample ( $n = 1,203$ ), and a similar effect size of  $f^2 = 0.011$  to test the same hypotheses in the US sample ( $n = 1,054$ ). In the overall sample ( $n = 2,257$ ), we had more statistical power and could detect an  $f^2$  effect of 0.005. (Note: For all sensitivity analyses we use the sample sizes used to conduct the regression analyses reported in the manuscript, which exclude speeders and individuals that failed the attention checks.) The sensitivity analyses thus indicate that we are able to detect small effects at 80% power.

We compute the effect size ( $f^2$ ) of the 4 predictors used in the regression analyses using the formula described in the G\*Power 3.1 Manual. For the UK sample, the effect size of model predicting *Severe Side Effects* is 0.010 while the effect size for the model predicting *Harm Vulnerable* is also 0.010. For the US sample, the effect size of model predicting *Severe Side Effects* is 0.009 while the effect size for the model predicting *Harm Vulnerable* is 0.006. For the combined sample (US+UK), the effect size of model predicting *Severe Side Effects* is 0.007 while the effect size for the model predicting *Harm Vulnerable* is 0.006.

Our overall effect sizes are small; nonetheless, we had sufficient sample sizes to detect such effects at 80% power in both the UK and combined samples. In the case of the US sample, our sample sizes were too small to confidently detect the reported effect. Put slightly differently, the UK analyses were sufficiently powered (power=80% [both models]), as were the analyses using the combined samples (power=91% [*Severe Side Effects*] & 85% [*Harm Vulnerable*]). But in the US sample, our analyses were under powered (power=69% [*Severe Side Effects*] & 49% [*Harm Vulnerable*]).

Faul, F., Erdfelder, E., Lang, A.-G., & Buchner, A. (2007). G\*Power 3: A flexible statistical power analysis program for the social, behavioral, and biomedical sciences. *Behavior Research Methods*, 39(2), 175–191. <https://doi.org/10.3758/BF03193146>

## Treatment Vignettes

### US Respondents

*Condition 1: Control (misinformation only)*

#### **Protesters March in Washington DC**

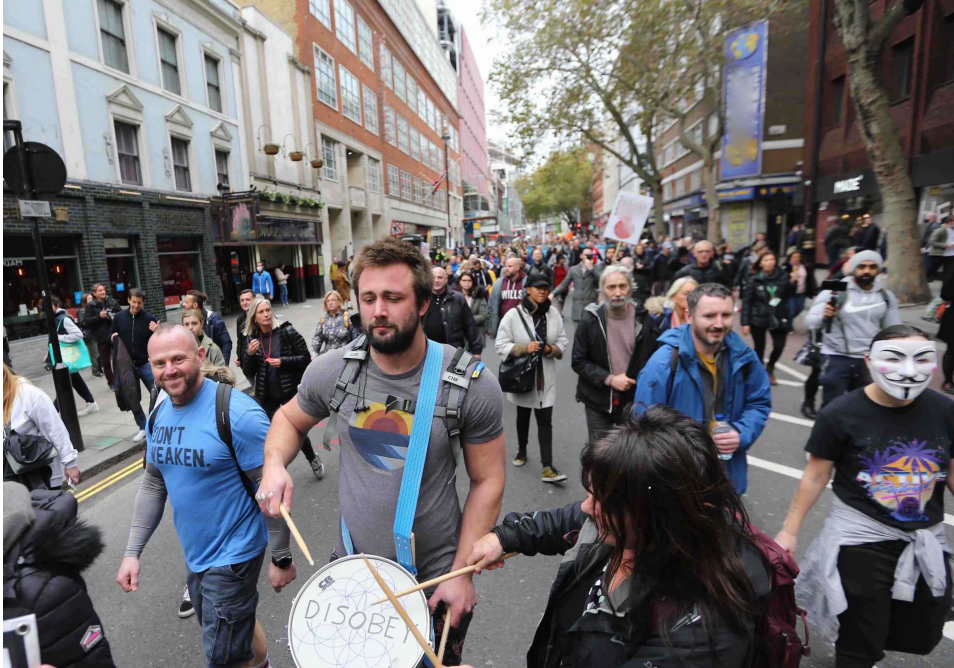

By Gemma Wallace

WASHINGTON—Crowds of demonstrators marched through the streets of Washington DC to voice their concerns about the risks of COVID-19 vaccines. During the march, a group of protesters gathered at a local vaccine clinic, chanting “COVID Doesn’t Kill Children, Vaccines Kill Children” and “Trust Your Body, Not Big Pharma” as patients waited in line to receive their vaccinations.

A spokesperson for Vaccine Truth Now claimed the protest was necessary because the medical community and the government are lying to people about the risks of COVID-19 vaccines. “These so-called vaccines cause heart damage in 1 in 10 children. They cause miscarriages and infertility in women. People need to know the truth.”

Carol Richards expressed concerns shared by many. “I’m not anti-vax, but I worry about the dangers of an experimental vaccine. My children aren’t guinea pigs.” Protester Karen Johnson added, “Women need to know more about the risks of these vaccines, especially if they’re pregnant.”

Similar protests have occurred in cities around the world, indicating the uncertainty many people feel about COVID-19 vaccines.

*Condition 2: Debunking (Health)*

## **Protesters March in Washington DC**

(Photo identical to condition 1)

By Gemma Wallace

WASHINGTON—Crowds of demonstrators marched through the streets of Washington DC to voice their concerns about the risks of COVID-19 vaccines. During the march, a group of protesters gathered at a local vaccine clinic, chanting “COVID Doesn’t Kill Children, Vaccines Kill Children” and “Trust Your Body, Not Big Pharma” as patients waited in line to receive their vaccinations.

A spokesperson for Vaccine Truth Now claimed the protest was necessary because the medical community and the government are lying to people about the risks of COVID-19 vaccines. “These so-called vaccines cause heart damage in 1 in 10 children. They cause miscarriages and infertility in women. They aren’t safe”

Carol Richards expressed concerns shared by many. “I’m not anti-vax, but I worry about the dangers of an experimental vaccine. My children aren’t guinea pigs.” Protester Karen Johnson added, “Women need to know more about the risks of these vaccines, especially if they’re pregnant.”

Asked for her response, pediatrician Theresa Robinson stated: “Millions of children—including both of my own kids —have been vaccinated against COVID-19. The vaccines are very safe and provide children and their families high levels of protection against a very serious disease.”

Damien Gordon, head of Intensive Care at St. Mary’s Hospital, added “There is zero evidence that vaccination poses a risk to pregnant women. Getting vaccinated is the best way for expectant mothers to protect themselves and their babies against COVID-19.”

Similar protests have occurred in cities around the world, indicating the uncertainty many people feel about COVID-19 vaccines.

*Condition 3: Debunking (Political)*

**Protesters March in Washington DC**

(Photo identical to condition 1)

By Gemma Wallace

WASHINGTON—Crowds of demonstrators marched through the streets of Washington DC to voice their concerns about the risks of COVID-19 vaccines. During the march, a group of protesters gathered at a local vaccine clinic, chanting “COVID Doesn’t Kill Children, Vaccines Kill Children” and “Trust Your Body, Not Big Pharma” as patients waited in line to receive their vaccinations.

A spokesperson for Vaccine Truth Now claimed the protest was necessary because the medical community and the government are lying to people about the risks of COVID-19 vaccines. “These so-called vaccines cause heart damage in 1 in 10 children. They cause miscarriages and infertility in women. People need to know the truth.”

Carol Richards expressed concerns shared by many. “I’m not anti-vax, but I worry about the dangers of an experimental vaccine. My children aren’t guinea pigs.” Protester Karen Johnson added, “Women need to know more about the risks of these vaccines, especially if they’re pregnant.”

Asked for her response, Congresswoman Theresa Robinson stated “Millions of children—including both of my own kids —have been vaccinated against COVID-19. The vaccines are very safe and provide children and their families high levels of protection against a very serious disease.”

Damien Gordon, a spokesperson for the Office of the President, added, “There is zero evidence that vaccination poses a risk to pregnant women. Getting vaccinated is the best way for expectant mothers to protect themselves and their babies against COVID-19.”

Similar protests have occurred in cities around the world, indicating the uncertainty many people feel about COVID-19 vaccines.

*Condition 4: Discrediting (Health)*

**Protesters March in Washington DC**

(Photo identical to condition 1)

By Gemma Wallace

WASHINGTON—Crowds of demonstrators marched through the streets of Washington DC to voice their concerns about the risks of COVID-19 vaccines. During the march, a group of protesters gathered at a local vaccine clinic, chanting “COVID Doesn’t Kill Children, Vaccines Kill Children” and “Trust Your Body, Not Big Pharma” as patients waited in line to receive their vaccinations.

A spokesperson for Vaccine Truth Now claimed the protest was necessary because the medical community and the government are lying to people about the risks of COVID-19 vaccines. “These so-called vaccines cause heart damage in 1 in 10 children. They cause miscarriages and infertility in women. People need to know the truth.”

Carol Richards expressed concerns shared by many. “I’m not anti-vax, but I worry about the dangers of an experimental vaccine. My children aren’t guinea pigs.” Protester Karen Johnson added, “Women need to know more about the risks of these vaccines, especially if they’re pregnant.”

Pediatrician Theresa Robinson denounced the protesters: “I have lost all patience with anti-vaxxers and their nonsense. They are discouraging people from protecting themselves and putting lives at risk. They should be ashamed.”

Damien Gordon, head of Intensive Care at St. Mary’s Hospital, also condemned the demonstrators: “They are selfish idiots and their actions are dangerous. So many of us have worked tirelessly throughout the pandemic to save people. Groups like that are an insult to our sacrifices.”

Similar protests have occurred in cities around the world, indicating the uncertainty many people feel about COVID-19 vaccines.



*Condition 5: Discrediting (Political)*

## **Protesters March in Washington DC**

(Photo identical to condition 1)

By Gemma Wallace

WASHINGTON—Crowds of demonstrators marched through the streets of Washington DC to voice their concerns about the risks of COVID-19 vaccines. During the march, a group of protesters gathered at a local vaccine clinic, chanting “COVID Doesn’t Kill Children, Vaccines Kill Children” and “Trust Your Body, Not Big Pharma” as patients waited in line to receive their vaccinations.

A spokesperson for Vaccine Truth Now claimed the protest was necessary because the medical community and the government are lying to people about the risks of COVID-19 vaccines. “These so-called vaccines cause heart damage in 1 in 10 children. They cause miscarriages and infertility in women. People need to know the truth.”

Carol Richards expressed concerns shared by many. “I’m not anti-vax, but I worry about the dangers of an experimental vaccine. My children aren’t guinea pigs.” Protester Karen Johnson added, “Women need to know more about the risks of these vaccines, especially if they’re pregnant.”

Congresswoman Theresa Robinson denounced the protesters: “I have lost all patience with anti-vaxxers and their nonsense. They are discouraging people from protecting themselves and putting lives at risk. They should be ashamed.”

Damien Gordon, a spokesperson for the Office of the President, also condemned the demonstrators: “They are selfish idiots, and their actions are dangerous. So many doctors and nurses across the country have worked tirelessly throughout the pandemic to save people. Groups like that are an insult to their sacrifices.”

Similar protests have occurred in cities around the world, indicating the uncertainty many people feel about COVID-19 vaccines.

## UK Respondents

*Condition 1: Control (misinformation only)*

### **Protesters March in London**

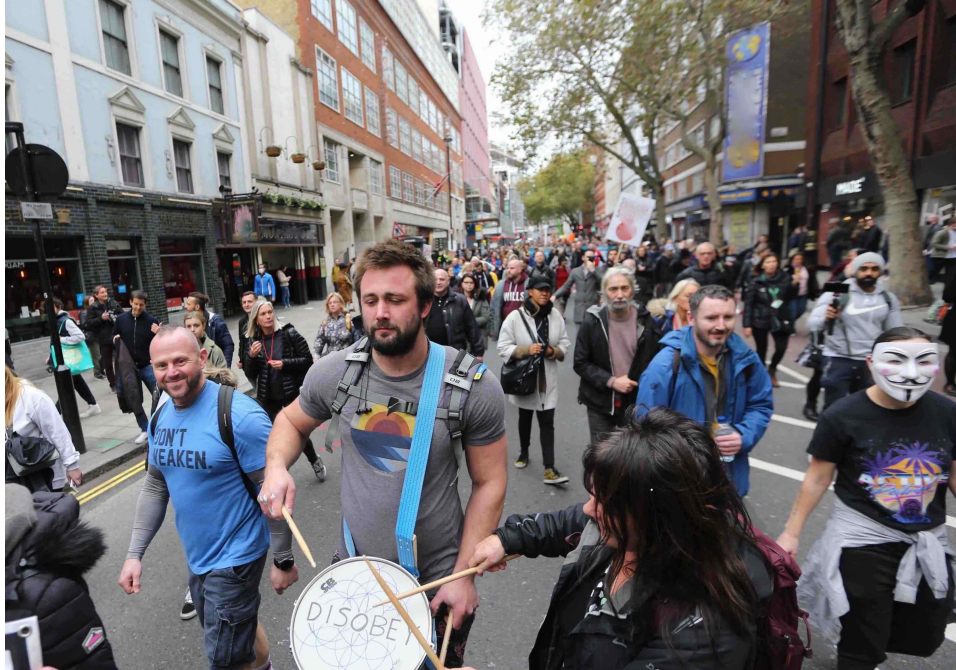

By Gemma Wallace

London— Crowds of demonstrators marched through the streets of London to voice their concerns about the risks of COVID-19 vaccines. During the march, a group of protesters gathered at a walk-in vaccine clinic, chanting “COVID Doesn’t Kill Children, Vaccines Kill Children” and “Trust Your Body, Not Big Pharma” as patients queued to receive their jabs.

A spokesperson for Vaccine Truth Now claimed the protest was necessary because the medical community and the government are lying to people about the risks of COVID-19 vaccines. “These so-called vaccines cause heart damage in 1 in 10 children. They cause miscarriages and infertility in women. People need to know the truth.”

Carol Richards expressed concerns shared by many. “I’m not anti-vax, but I worry about the dangers of an experimental vaccine. My children aren’t guinea pigs.” Protester Karen Johnson added, “Women need to know more about the risks these jabs carry, especially if they’re pregnant.”

Similar protests have occurred in cities around the world, indicating the uncertainty many people feel about COVID-19 vaccines.

*Condition 2: Debunking (Health)*

**Protesters March in London**

(Photo identical to condition 1)

By Gemma Wallace

London— Crowds of demonstrators marched through the streets of London to voice their concerns about the risks of COVID-19 vaccines. During the march, a group of protesters gathered at a walk-in vaccine clinic, chanting “COVID Doesn’t Kill Children, Vaccines Kill Children” and “Trust Your Body, Not Big Pharma” as patients queued to receive their jabs.

A spokesperson for Vaccine Truth Now claimed the protest was necessary because the medical community and the government are lying to people about the risks of COVID-19 vaccines. “These so-called vaccines cause heart damage in 1 in 10 children. They cause miscarriages and infertility in women. They aren’t safe”

Carol Richards expressed concerns shared by many. “I’m not anti-vax, but I worry about the dangers of an experimental vaccine. My children aren’t guinea pigs.” Protester Karen Johnson added, “Women need to know more about the risks these jabs carry, especially if they’re pregnant.”

Asked for her response, GP Theresa Robinson stated: “Millions of children—including both of my own kids—have been vaccinated against COVID-19. The vaccines are very safe and provide children and their families high levels of protection against a very serious disease.”

Damien Gordon, head of Intensive Care at St. Mary’s Hospital, added “There is zero evidence that vaccination poses a risk to pregnant women. Getting vaccinated is the best way for expectant mothers to protect themselves and their babies against COVID-19.”

Similar protests have occurred in cities around the world, indicating the uncertainty many people feel about COVID-19 vaccines.

*Condition 3: Debunking (Political)*

**Protesters March in London**

(Photo identical to condition 1)

By Gemma Wallace

London— Crowds of demonstrators marched through the streets of London to voice their concerns about the risks of COVID-19 vaccines. During the march, a group of protesters gathered at a walk-in vaccine clinic, chanting “COVID Doesn’t Kill Children, Vaccines Kill Children” and “Trust Your Body, Not Big Pharma” as patients queued to receive their jabs.

A spokesperson for Vaccine Truth Now claimed the protest was necessary because the medical community and the government are lying to people about the risks of COVID-19 vaccines. “These so-called vaccines cause heart damage in 1 in 10 children. They cause miscarriages and infertility in women. People need to know the truth.”

Carol Richards expressed concerns shared by many. “I’m not anti-vax, but I worry about the dangers of an experimental vaccine. My children aren’t guinea pigs.” Protester Karen Johnson added, “Women need to know more about the risks these jabs carry, especially if they’re pregnant.”

Asked for her response, MP Theresa Robinson stated “Millions of children—including both of my own kids —have been vaccinated against COVID-19. The vaccines are very safe and provide children and their families high levels of protection against a very serious disease.”

Damien Gordon, a spokesperson for the Cabinet Office, added, “There is zero evidence that vaccination poses a risk to pregnant women. Getting vaccinated is the best way for expectant mothers to protect themselves and their babies against COVID-19.”

Similar protests have occurred in cities around the world, indicating the uncertainty many people feel about COVID-19 vaccines.

*Condition 4: Discrediting (Health)*

**Protesters March in London**

(Photo identical to condition 1)

By Gemma Wallace

London— Crowds of demonstrators marched through the streets of London to voice their concerns about the risks of COVID-19 vaccines. During the march, a group of protesters gathered at a walk-in vaccine clinic, chanting “COVID Doesn’t Kill Children, Vaccines Kill Children” and “Trust Your Body, Not Big Pharma” as patients queued to receive their jabs.

A spokesperson for Vaccine Truth Now claimed the protest was necessary because the medical community and the government are lying to people about the risks of COVID-19 vaccines. “These so-called vaccines cause heart damage in 1 in 10 children. They cause miscarriages and infertility in women. People need to know the truth.”

Carol Richards expressed concerns shared by many. “I’m not anti-vax, but I worry about the dangers of an experimental vaccine. My children aren’t guinea pigs.” Protester Karen Johnson added, “Women need to know more about the risks these jabs carry, especially if they’re pregnant.”

GP Theresa Robinson denounced the protesters: “I have lost all patience with anti-vaxxers and their nonsense. They are discouraging people from protecting themselves and putting lives at risk. They should be ashamed.”

Damien Gordon, head of Intensive Care at St. Mary’s Hospital, also condemned the demonstrators: “They are selfish idiots, and their actions are dangerous. So many of us have worked tirelessly throughout the pandemic to save people. Groups like that are an insult to our sacrifices.”

Similar protests have occurred in cities around the world, indicating the uncertainty many people feel about COVID-19 vaccines.

*Condition 5: Discrediting (Political)*

## **Protesters March in London**

(Photo identical to condition 1)

By Gemma Wallace

London— Crowds of demonstrators marched through the streets of London to voice their concerns about the risks of COVID-19 vaccines. During the march, a group of protesters gathered at a walk-in vaccine clinic, chanting “COVID Doesn’t Kill Children, Vaccines Kill Children” and “Trust Your Body, Not Big Pharma” as patients queued to receive their jabs.

A spokesperson for Vaccine Truth Now claimed the protest was necessary because the medical community and the government are lying to people about the risks of COVID-19 vaccines. “These so-called vaccines cause heart damage in 1 in 10 children. They cause miscarriages and infertility in women. People need to know the truth.”

Carol Richards expressed concerns shared by many. “I’m not anti-vax, but I worry about the dangers of an experimental vaccine. My children aren’t guinea pigs.” Protester Karen Johnson added, “Women need to know more about the risks these jabs carry, especially if they’re pregnant.”

MP Theresa Robinson denounced the protesters: “I have lost all patience with anti-vaxxers and their nonsense. They are discouraging people from protecting themselves and putting lives at risk. They should be ashamed.”

Damien Gordon, a spokesperson for the Cabinet Office, also condemned the demonstrators: “They are selfish idiots, and their actions are dangerous. So many doctors and nurses across the country have worked tirelessly throughout the pandemic to save people. These groups are an insult to their sacrifices.”
